# Supplementary material for: Continuity and Admixture in the Last Five Millennia of Levantine History from Ancient Canaanite and Present-Day Lebanese Genome Sequences
Source: PubMed Central journal article supplement (PMC5544389; doi:10.1016/j.ajhg.2017.06.013), 2017-07-27
Supplement: mmc1.pdf [file mmc1.pdf]

**The American Journal of Human Genetics, Volume 101**

**Supplemental Data**

**Continuity and Admixture in the Last Five Millennia  
of Levantine History from Ancient Canaanite  
and Present-Day Lebanese Genome Sequences**

**Marc Haber, Claude Doumet-Serhal, Christiana Scheib, Yali Xue, Petr Danecek, Massimo Mezzavilla, Sonia Youhanna, Rui Martiniano, Javier Prado-Martinez, Michał Szpak, Elizabeth Matisoo-Smith, Holger Schutkowski, Richard Mikulski, Pierre Zalloua, Toomas Kivisild, and Chris Tyler-Smith**

## Supplementary materials

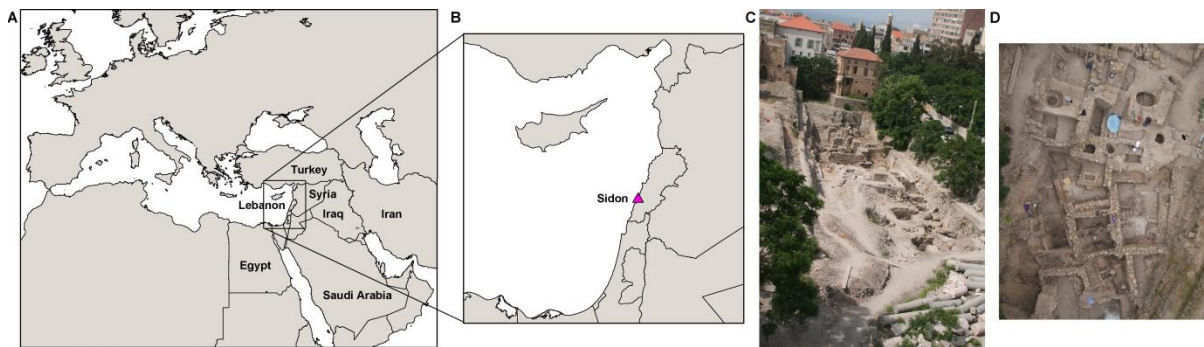

**Figure S1. The Sidon excavation site.** (A) Map shows the location of Lebanon with present-day political borders in the Near East. (B) A magnification showing the Levant region and the location of the city of Sidon. (C) Photo shows the Sidon excavation site which included the burials of individuals studied here. (D) Aerial view of excavation details from Season 12 (Bronze Age structures).

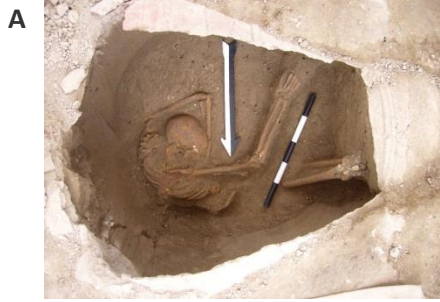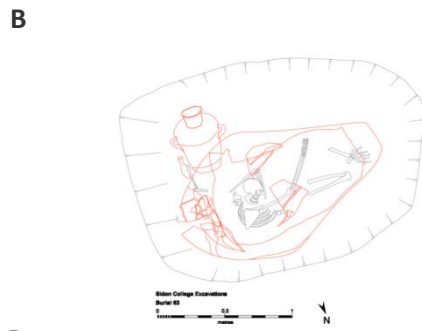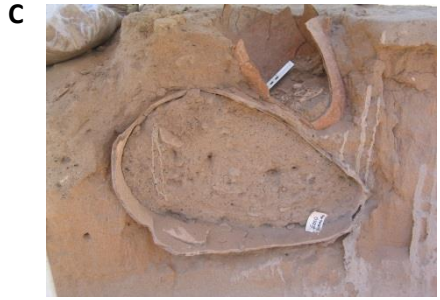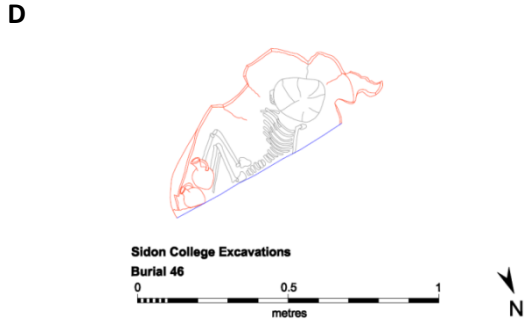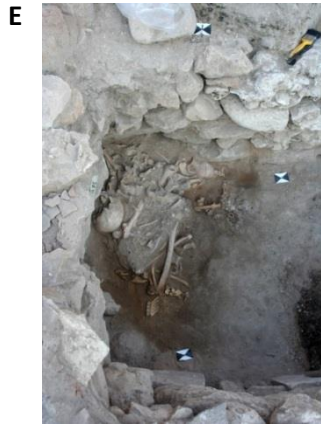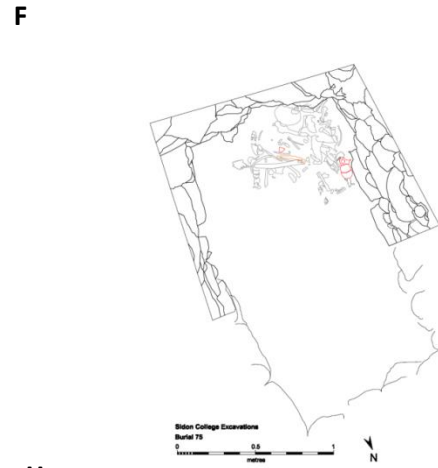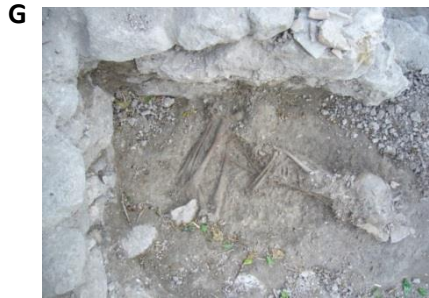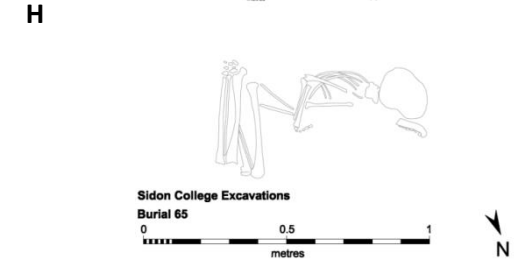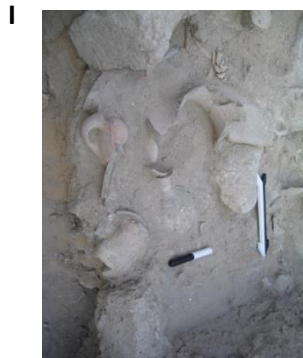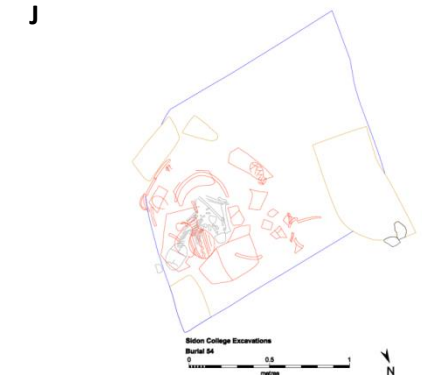

**Figure S2. Burials of individuals analysed in this study.** (A) and (B) burial 63: Stratum 6 Middle Bronze Age II B about 1600 BC. Consisted of an unusually large burial containing the remains of at least two individuals. (C) and (D) burial 46: Intermediate Middle Bronze Age II A-B about 1750 BC. This burial consisted of a jar burial containing an infant. (E) and (F) burial 75: Intermediate Middle Bronze Age II A-B about 1750 BC. It contained the commingled remains of 3 individuals. (G) and (H) burial 65: Stratum 6 Middle Bronze Age II B about 1600 BC. This burial consisted of a simple unlined burial of a single sub adult individual. (I) and (J) burial 54: Middle Bronze Age II B around about 1650 BC. This jar consisted of the burial of a sub adult, probably 8-12 years old.

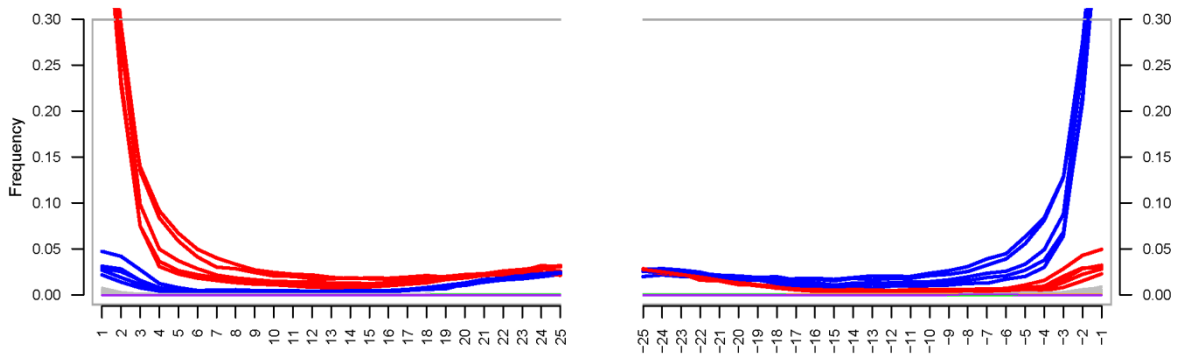

**Figure S3. Post-mortem damage patterns.** Base substitutions C>T from the 5' (left) and G>A from the 3' end (right) for all Sidon samples show patterns typical of ancient DNA damage.

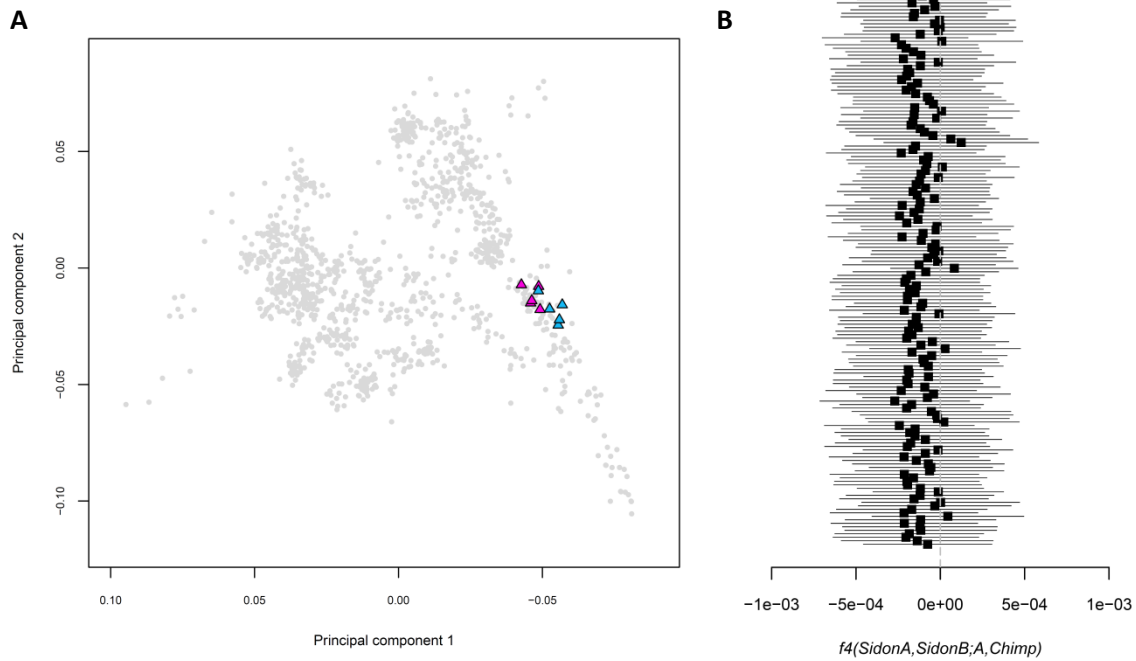

**Figure S4. Testing for contamination using sequences with evidence of post-mortem damage (PMD).** (A) PCA is similar to Figure 1 but additionally includes the ancient individuals represented only by sequences with a PMD score of at least 3 (blue triangles) to remove potentially contaminating sequences from present-day individuals. The samples overlap samples with no damage-restriction (pink triangles). (B)  $f_4$  statistics testing if a modern population *A* in the dataset has excess affinity to samples with no damage-restriction (*SidonB*) compared with *SidonA* represented only by sequences with a PMD score  $>3$ . Tests for all modern populations do not significantly deviate from zero. The PCA and  $f_4$  statistics suggest the Sidon DNA samples are authentic and minimally contaminated.

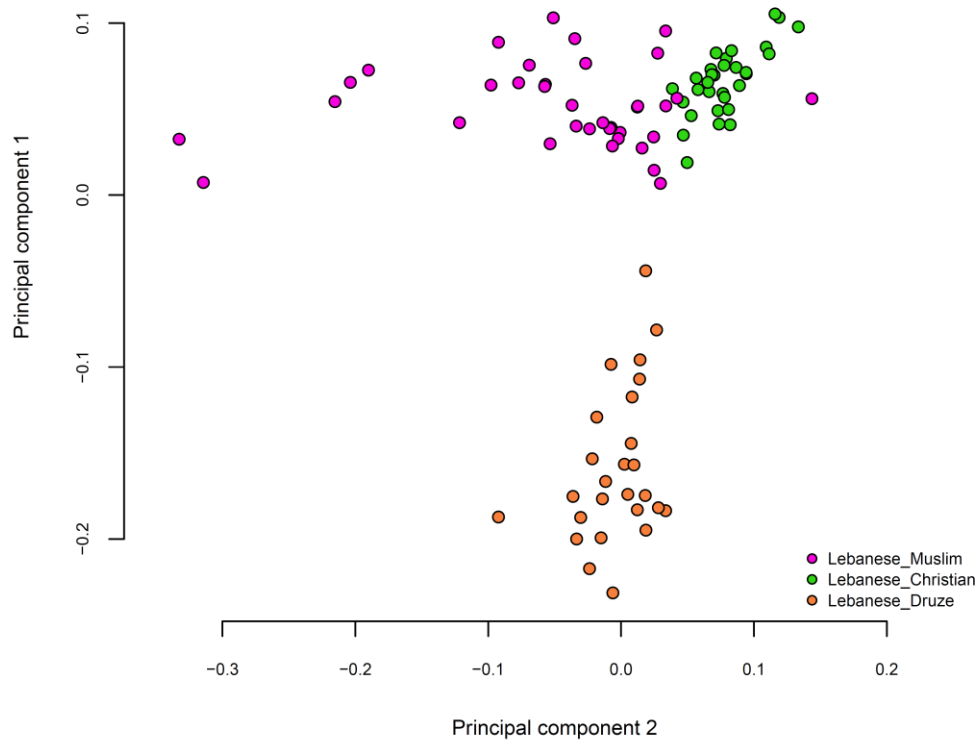

**Figure S5. Genetic structure in present-day Lebanese.** Principal components analysis of 99 present-day Lebanese sequenced in this study. We used the *smartpca* program of EIGENSOFT on SNPs overlapping with the 1.2M SNPs from Lazaridis et al. 2016<sup>1</sup> and set *killr2*: YES, *r2thresh*: 0.7, *outliersigmathresh*: 5. The genetic diversity of the sequenced Lebanese captures the previously-described genetic diversity in Lebanon<sup>2</sup> using a set with a larger sample size (1341) and array data.

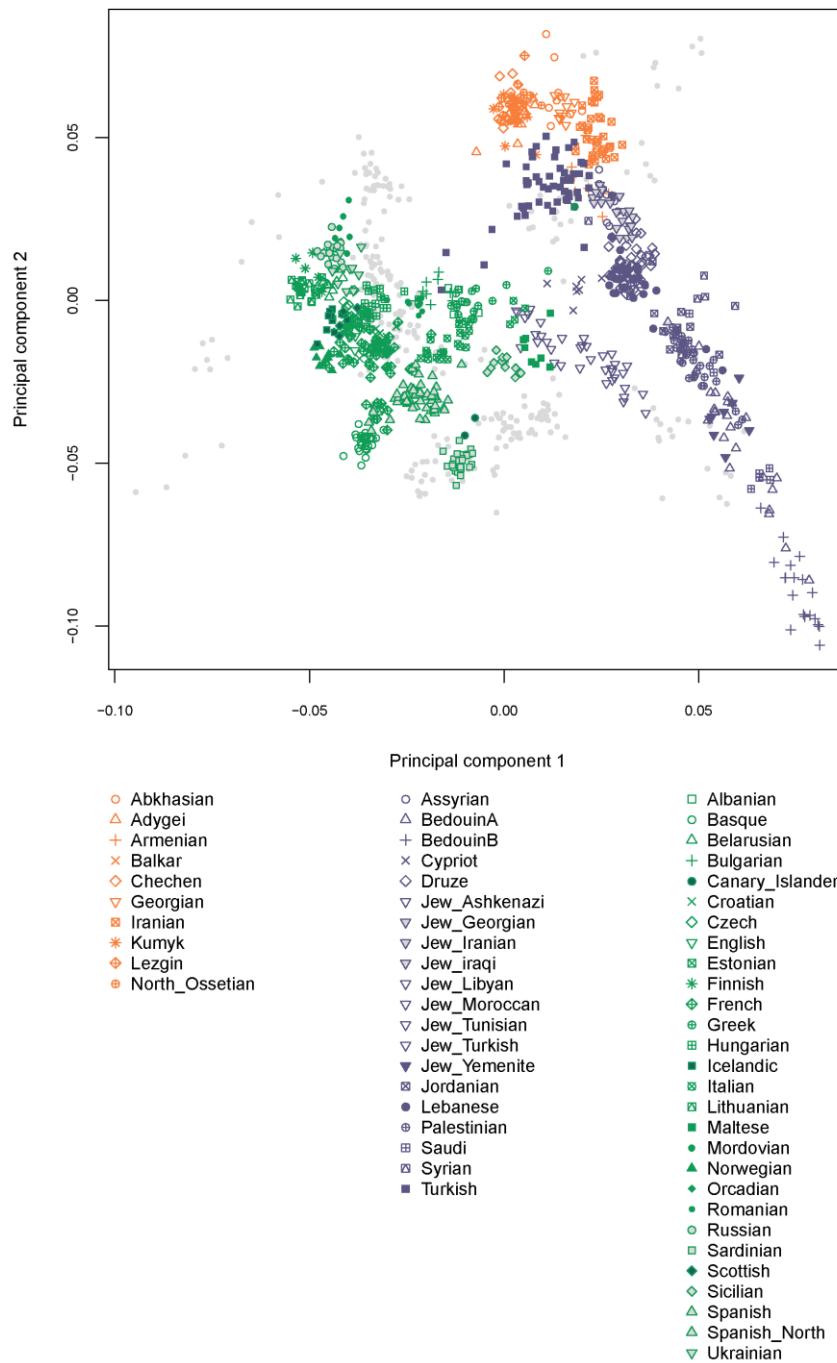

**Figure S6. PCA showing the position of present-day populations.** The gray points represent the projected ancient samples shown in Figure1.



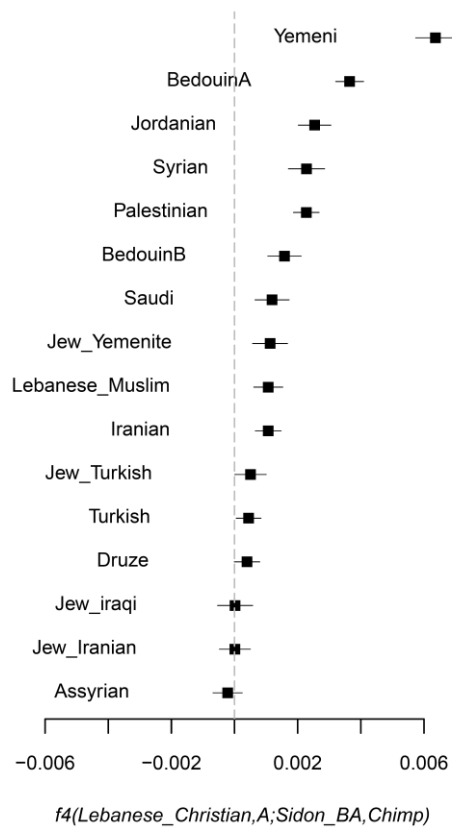

**Figure S7. Testing Sidon\_BA affinity to present-day Near Easterners.** The statistic  $f_4(\text{Lebanese\_Christian}, \text{Test}; \text{Sidon\_BA}, \text{Chimpanzee})$  is significantly positive for most populations when *Test* is a present-day Near Easterner, indicating Sidon\_BA shares more alleles with the Lebanese than with other Near Easterners. We chose Lebanese\_Christian to represent present-day Lebanese in this test as this population has been shown to be relatively isolated and had no significant admixture in recent times with neighbouring populations. In this and following figures we plot the  $f_4$  statistic value and  $\pm 3$  standard errors.

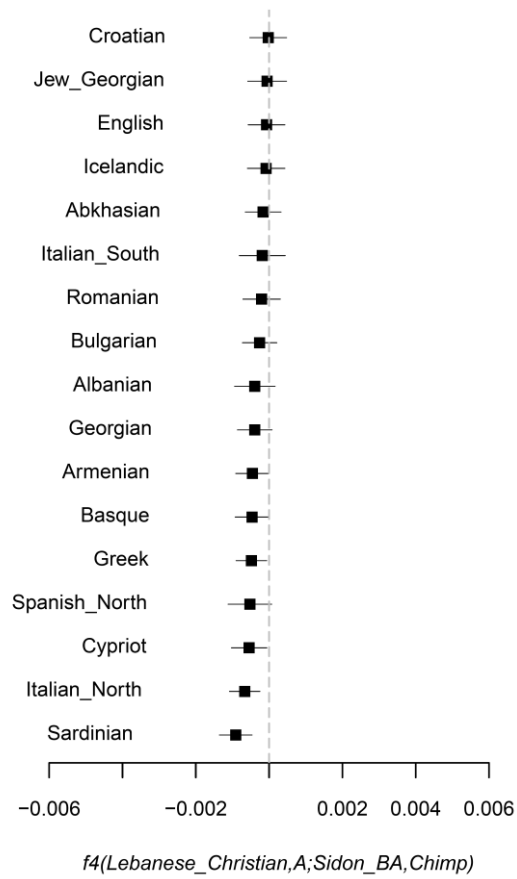

**Figure S8. Testing Sidon\_BA affinity to worldwide populations.** The plot shows all the negative statistics from  $f_4(\text{Lebanese\_Christian}, \text{Test}; \text{Sidon\_BA}, \text{Chimpanzee})$  when *Test* is one of the 150 present-day populations available in the Human Origins dataset.

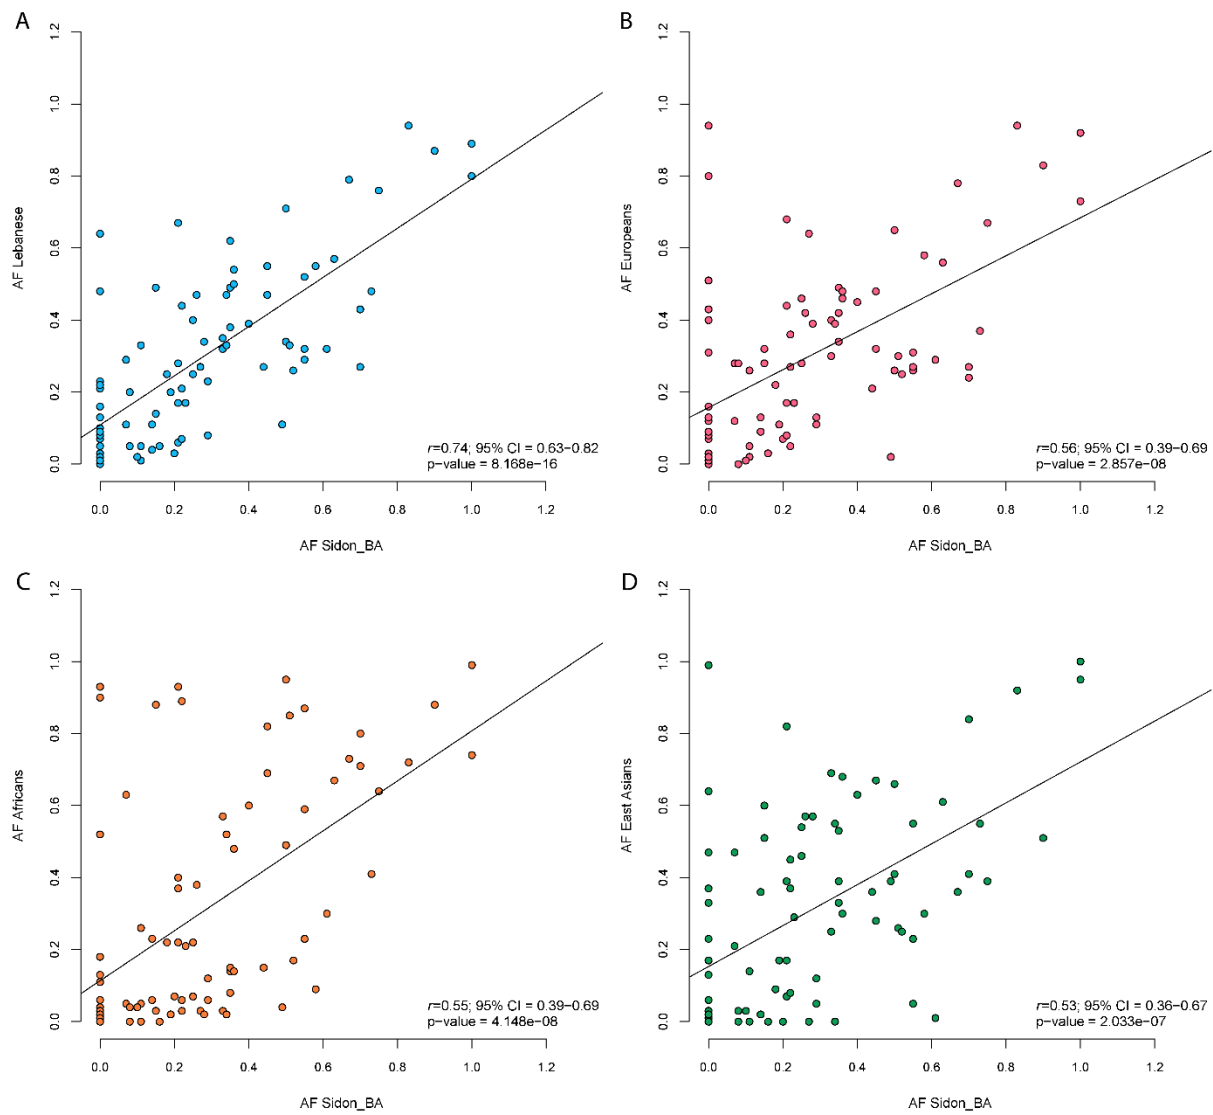

**Figure S9. Correlation between the frequencies of the putative functional variants in Sidon\_BA and present-day populations: (A) Lebanese (B) Europeans (C) Africans and (D) East Asians.**

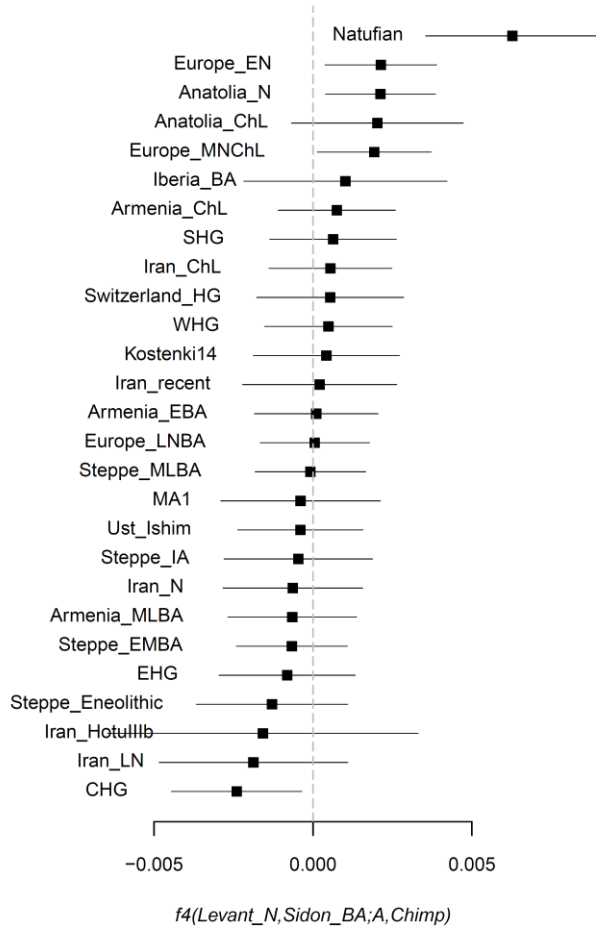

**Figure S10. Admixture in Bronze Age Levantine populations (transversions only).** We replicate the statistic  $f_4(\text{Levant}_N, \text{Sidon\_BA}; \text{Ancient Eurasian}, \text{Chimpanzee})$  using ~120,000 transversions and get results qualitatively similar to the results from using all variants.

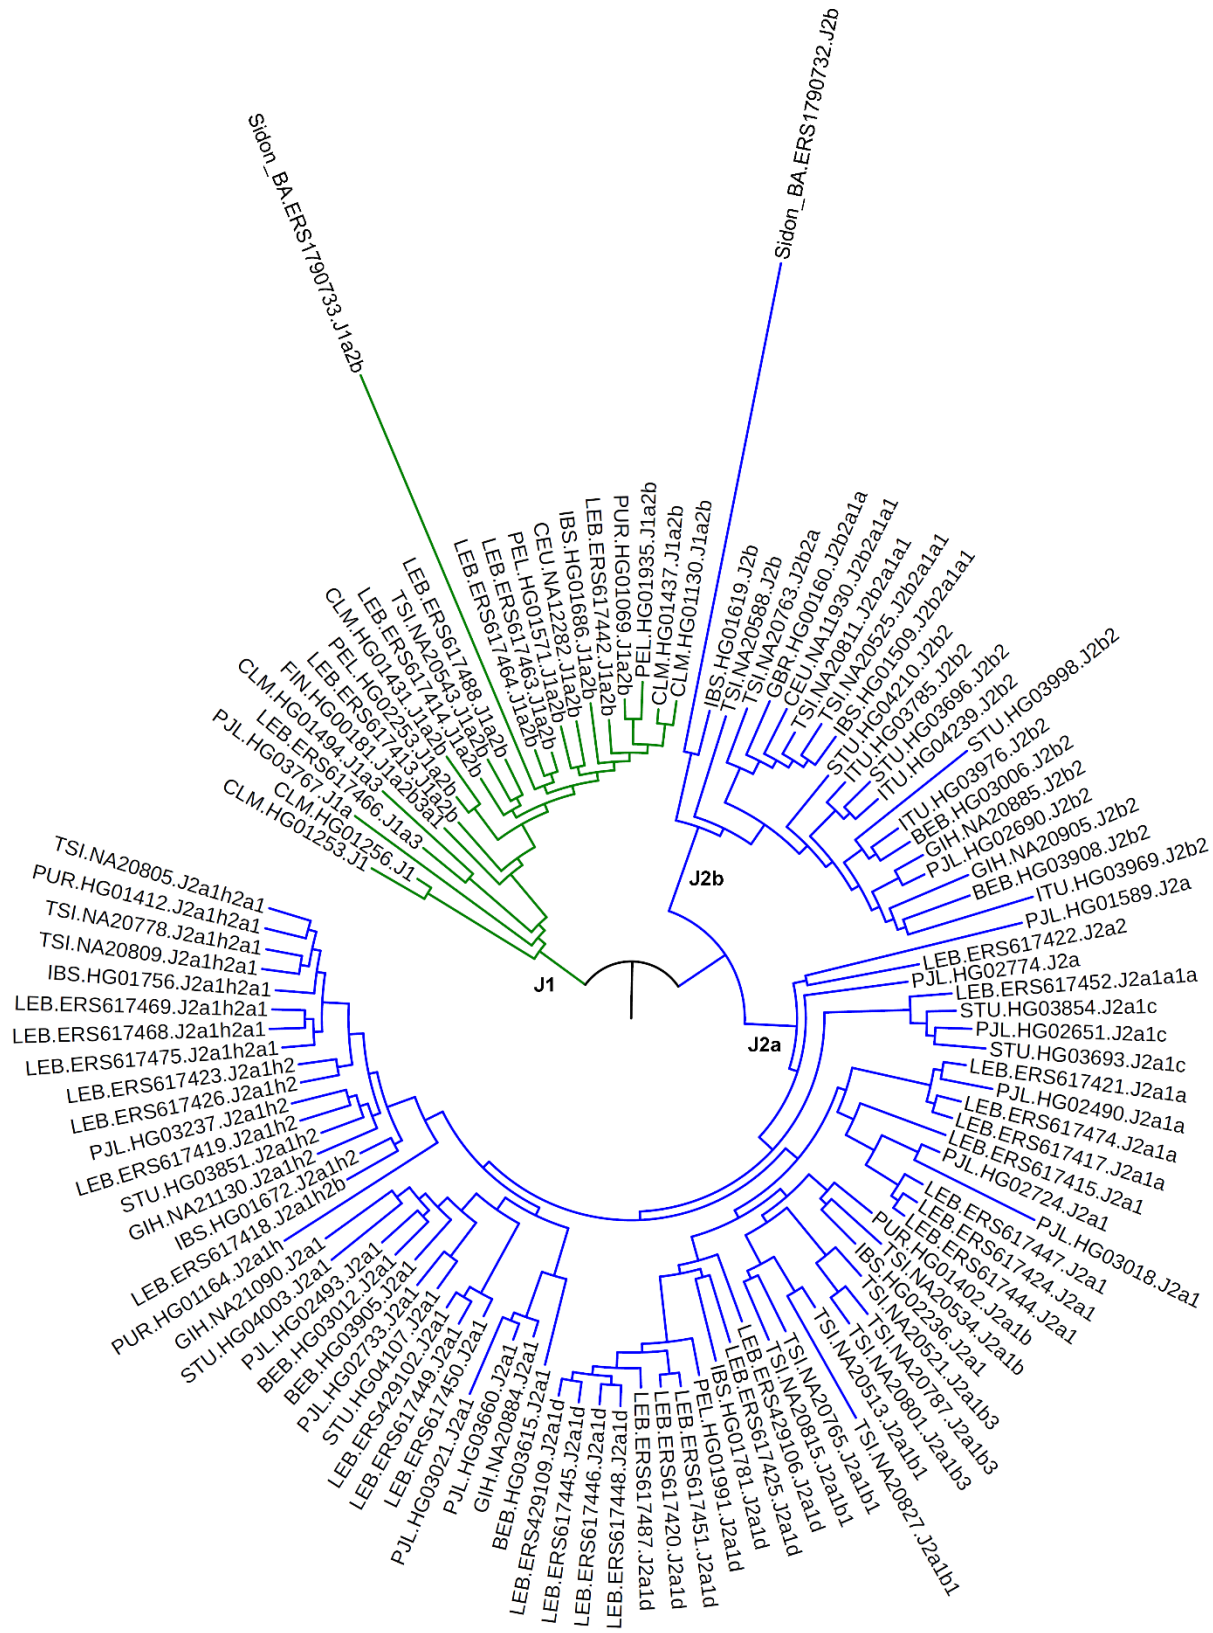

**Figure S11. Y-chromosome J lineage relationship tree.** A maximum likelihood phylogeny of Y chromosomes belonging to haplogroup J inferred using RAxML on males from the 1000 Genomes Project (76), present-day Lebanese (35), and Sidon\_BA (2). Tip labels show population and sample name as well as haplogroup identified by yHaplo using ISOGG 2016.01.04 annotations.

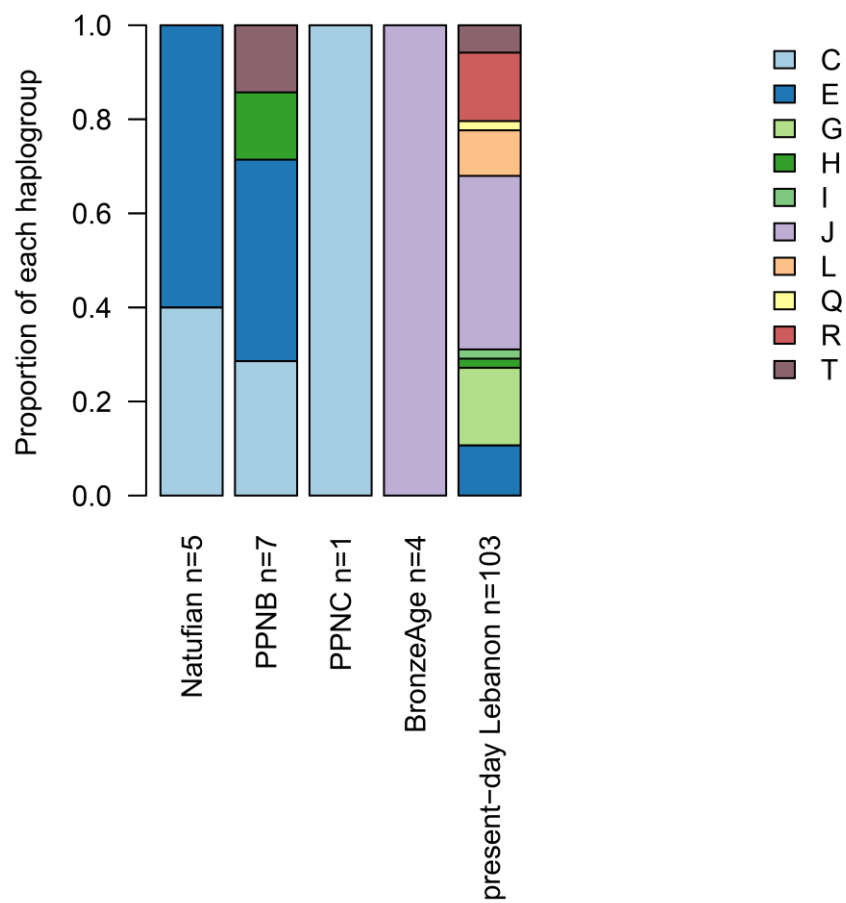

**Figure S12. Y-chromosome lineages frequencies in the Levant from Natufians to present-day populations.**

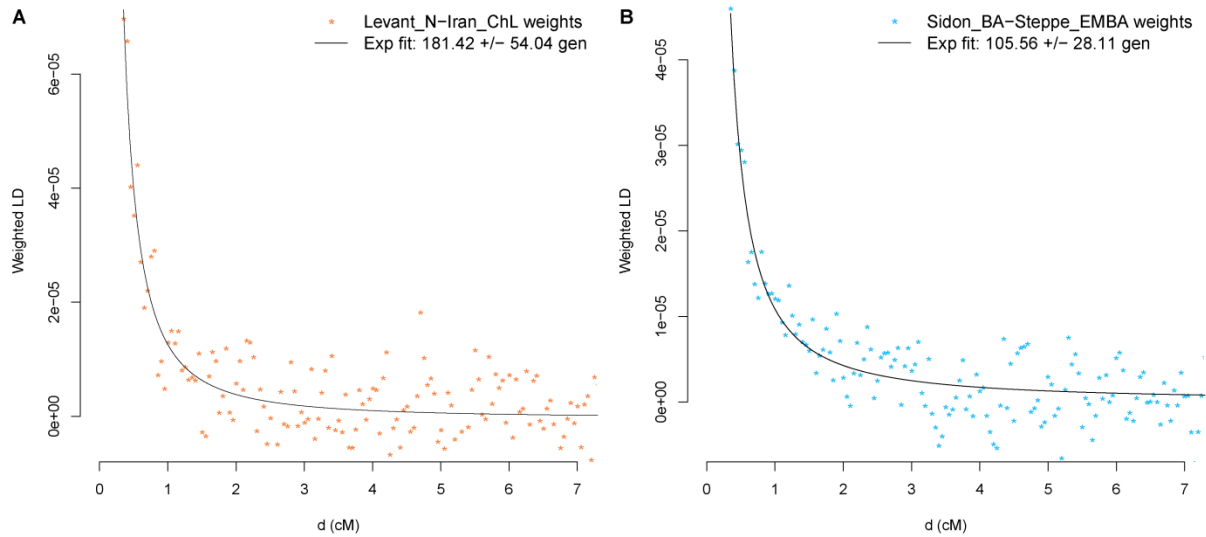

**Figure S13. Time of admixture in the Levant.** (A) and (B) Weighted LD decay curves for present-day Lebanese using ancient populations as references. (A) Using a generation time of 28 years; a mixture between populations related to Neolithic Levant and Chalcolithic Iran appears to have occurred 6,600-3,550 years ago and (B) mixture between populations related to Bronze Age Sidon and Bronze Age steppe occurred 3,750-2,170 years ago.

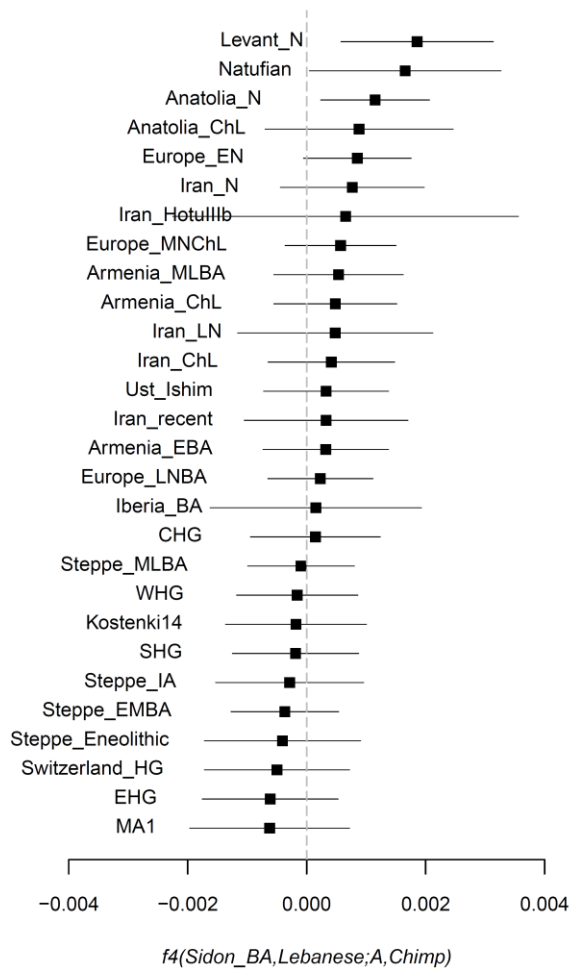

**Figure S14. Admixture in present-day Levantine populations (transversions only).** We replicate the statistic  $f_4(\text{Sidon\_BA, Lebanese; Ancient Eurasian, Chimpanzee})$  using only transversions and get results qualitatively similar to the results from using all variants.



**Table S1. Contamination estimates.**

| <b>Sample</b>        | <b>From mtDNA analysis (CI)<sup>a</sup></b> | <b>From male X chromosome analysis (SE)<sup>b</sup></b> |
|----------------------|---------------------------------------------|---------------------------------------------------------|
| <b>ERS1790732</b>    | 0.01 (0-0.02)                               |                                                         |
| Method1 <sup>†</sup> |                                             | 0.012 (0.002)                                           |
| Method2              |                                             | 0.014 (0.003)                                           |
| <b>ERS1790733</b>    | 0.01 (0-0.02)                               |                                                         |
| Method1              |                                             | 0.017 (0.005)                                           |
| Method2              |                                             | 0.019 (0.005)                                           |
| <b>ERS1790729</b>    | 0.01 (0-0.02)                               |                                                         |
| <b>ERS1790730</b>    | 0.01 (0-0.02)                               |                                                         |
| <b>ERS1790731</b>    | 0.01 (0-0.02)                               |                                                         |

<sup>†</sup>Using schmutzi<sup>3</sup>

<sup>b</sup>Two tests using ANGSD based on methods described in Rasmussen et al. 2011<sup>4</sup>

**Table S2. Phenotypic and disease traits in Sidon\_BA.** List of putatively functional variants previously identified in the Levant region and their allele frequencies in present-day populations as well as Bronze Age Sidon. We include the read counts as guidance to allele authenticity: for example little supported C>T and G>A variations should be taken with caution.

| Chr | Position  | rs ID       | Ref | Alt | Gene       | Phenotype                                                       | AF in present-day populations |        |        |        | AF in Bronze Age Sidon | Read counts in ancient samples |         |         | Sidon samples with coverage |   |
|-----|-----------|-------------|-----|-----|------------|-----------------------------------------------------------------|-------------------------------|--------|--------|--------|------------------------|--------------------------------|---------|---------|-----------------------------|---|
|     |           |             |     |     |            |                                                                 | AF_Lebanese                   | AF_AFR | AF_ASN | AF_EUR | AF_Sidon               | total A                        | total C | total G | total T                     | n |
| 2   | 136608646 | rs4988235   | G   | A   | MCM6       | Lactose tolerance                                               | 0.02                          | 0.03   | 0      | 0.51   | 0.00                   | 0                              | 0       | 6       | 0                           | 3 |
| 5   | 33951693  | rs16891982  | C   | G   | SLC45A2    | Pigmentation                                                    | 0.64                          | 0.04   | 0.01   | 0.94   | 0.00                   | 0                              | 9       | 0       | 0                           | 4 |
| 5   | 33963870  | rs26722     | C   | T   | SLC45A2    | Pigmentation                                                    | 0.11                          | 0.04   | 0.39   | 0.02   | 0.49                   | 0                              | 7       | 0       | 5                           | 4 |
| 15  | 28365618  | rs12913832  | A   | G   | HERC2      | Pigmentation                                                    | 0.27                          | 0.03   | 0      | 0.64   | 0.27                   | 14                             | 0       | 3       | 0                           | 4 |
| 15  | 48426484  | rs1426654   | A   | G   | SLC24A5    | Pigmentation                                                    | 0.10                          | 0.93   | 0.99   | 0      | 0.00                   | 16                             | 0       | 0       | 0                           | 4 |
| 4   | 72618334  | rs7041      | A   | C   | GC         | Vitamin D levels                                                | 0.55                          | 0.09   | 0.3    | 0.58   | 0.58                   | 3                              | 7       | 0       | 0                           | 5 |
| 11  | 71152258  | rs736894    | C   | T   | DHCR7      | Vitamin D levels                                                | 0.34                          | 0.49   | 0.41   | 0.26   | 0.50                   | 0                              | 6       | 0       | 4                           | 4 |
| 7   | 141672604 | rs10246939  | T   | C   | TAS2R38    | Bitter taste perception                                         | 0.54                          | 0.48   | 0.68   | 0.46   | 0.36                   | 0                              | 5       | 0       | 10                          | 5 |
| 9   | 94118258  | rs10991898  | C   | T   | AUH        | 3-Methylglutamic aciduria type I                                | 0.20                          | 0.02   | 0.17   | 0.11   | 0.19                   | 0                              | 5       | 0       | 2                           | 4 |
| 4   | 100504566 | rs61733139  | G   | C   | MTTP       | Abetalipoproteinemia                                            | 0.01                          | 0.05   | 0      | 0.05   | 0.11                   | 1                              | 0       | 8       | 0                           | 5 |
| 4   | 100504664 | rs3816873   | T   | C   | MTTP       | Abetalipoproteinemia                                            | 0.33                          | 0.26   | 0.14   | 0.26   | 0.11                   | 0                              | 1       | 0       | 10                          | 4 |
| 4   | 100516022 | rs2306985   | C   | G   | MTTP       | Abetalipoproteinemia                                            | 0.47                          | 0.82   | 0.67   | 0.32   | 0.45                   | 0                              | 3       | 0       | 1                           | 3 |
| 4   | 1803704   | rs2234909   | T   | C   | FGFR3      | Achondroplasia                                                  | 0.17                          | 0.37   | 0.07   | 0.17   | 0.21                   | 0                              | 1       | 0       | 5                           | 4 |
| 11  | 5247141   | rs1609812   | G   | A   | HBB        | Beta thalassemia major                                          | 0.87                          | 0.88   | 0.51   | 0.83   | 0.90                   | 10                             | 0       | 2       | 0                           | 5 |
| 11  | 5248050   | rs35004220  | C   | T   | HBB        | Beta thalassemia major                                          | 0.05                          | 0      | 0      | 0      | 0.08                   | 0                              | 10      | 0       | 1                           | 4 |
| 15  | 91326099  | rs2227935   | C   | T   | BLM        | Bloom syndrome                                                  | 0.03                          | 0.07   | 0      | 0.07   | 0.20                   | 0                              | 8       | 0       | 2                           | 5 |
| 17  | 41244936  | rs799917    | G   | A   | BRC1       | Breast-ovarian cancer                                           | 0.44                          | 0.89   | 0.37   | 0.36   | 0.22                   | 4                              | 0       | 11      | 0                           | 5 |
| 6   | 12903957  | rs9349379   | A   | G   | PHACTR1    | CAD                                                             | 0.35                          | 0.03   | 0.69   | 0.4    | 0.33                   | 3                              | 0       | 2       | 0                           | 4 |
| 9   | 22098574  | rs4977574   | A   | G   | CDKN2B-AS1 | CAD                                                             | 0.62                          | 0.14   | 0.53   | 0.49   | 0.35                   | 5                              | 0       | 3       | 0                           | 4 |
| 9   | 107620867 | rs2238066   | C   | T   | ABCA1      | CAD in familial hypercholesterolemia, protection against        | 0.43                          | 0.71   | 0.41   | 0.24   | 0.70                   | 0                              | 5       | 0       | 11                          | 5 |
| 1   | 53712727  | rs5174      | C   | T   | LRP8       | Myocardial infarction                                           | 0.21                          | 0.02   | 0.03   | 0.4    | 0.00                   | 0                              | 6       | 0       | 0                           | 3 |
| 6   | 31540313  | rs909253    | A   | G   | LTA        | Myocardial infarction                                           | 0.23                          | 0.52   | 0.47   | 0.31   | 0.00                   | 11                             | 0       | 0       | 0                           | 4 |
| 12  | 10313448  | rs11053646  | C   | G   | OLR1       | Myocardial infarction                                           | 0.06                          | 0.22   | 0.17   | 0.08   | 0.21                   | 0                              | 9       | 2       | 1                           | 5 |
| 14  | 35761675  | rs1048990   | C   | G   | PSMA6      | Myocardial infarction                                           | 0.22                          | 0.03   | 0.37   | 0.16   | 0.00                   | 0                              | 6       | 0       | 0                           | 3 |
| 17  | 45368337  | rs15908     | A   | C   | ITGB3      | Myocardial infarction                                           | 0.48                          | 0.41   | 0.55   | 0.37   | 0.73                   | 3                              | 8       | 0       | 0                           | 4 |
| 13  | 113772707 | rs6041      | G   | A   | F7         | Myocardial infarction, decreased susceptibility to              | 0.23                          | 0.12   | 0.05   | 0.11   | 0.29                   | 2                              | 0       | 4       | 0                           | 4 |
| 6   | 6174866   | rs5982      | G   | A   | F13A1      | Myocardial infarction, protection against                       | 0.27                          | 0.15   | 0.36   | 0.21   | 0.44                   | 3                              | 0       | 4       | 0                           | 3 |
| 12  | 121416650 | rs1169288   | A   | C   | HNF1A      | Diabetes mellitus, noninsulin-dependent, 2                      | 0.49                          | 0.08   | 0.39   | 0.34   | 0.35                   | 3                              | 2       | 0       | 0                           | 3 |
| 12  | 121416864 | rs1800574   | C   | T   | HNF1A      | Diabetes mellitus, noninsulin-dependent, 2                      | 0.05                          | 0      | 0      | 0.03   | 0.16                   | 0                              | 8       | 0       | 1                           | 5 |
| 4   | 6302519   | rs1801212   | G   | A   | WFS1       | Diabetes mellitus, noninsulin-dependent, association with       | 0.80                          | 0.99   | 1      | 0.73   | 1.00                   | 14                             | 0       | 0       | 0                           | 4 |
| 4   | 6302889   | rs1801208   | G   | A   | WFS1       | Diabetes mellitus, noninsulin-dependent, association with       | 0.07                          | 0.03   | 0.08   | 0.05   | 0.22                   | 1                              | 0       | 5       | 0                           | 4 |
| 7   | 44189393  | rs144723656 | G   | A   | GCK        | Diabetes mellitus, noninsulin-dependent, late onset             | 0.00                          | 0      | 0      | 0.01   | 0.00                   | 0                              | 0       | 12      | 0                           | 4 |
| 8   | 118184783 | rs13266634  | C   | T   | SLC30A8    | Diabetes mellitus, noninsulin-dependent, susceptibility to      | 0.25                          | 0.07   | 0.46   | 0.28   | 0.25                   | 0                              | 13      | 0       | 3                           | 4 |
| 2   | 182542998 | rs8192556   | G   | T   | NEUROD1    | T2D                                                             | 0.05                          | 0      | 0      | 0.02   | 0.11                   | 1                              | 0       | 17      | 0                           | 4 |
| 2   | 227660544 | rs1801278   | C   | T   | IRS1       | T2D                                                             | 0.04                          | 0.06   | 0.02   | 0.09   | 0.14                   | 0                              | 4       | 0       | 1                           | 3 |
| 3   | 185511687 | rs4402960   | G   | T   | IGFBP2     | T2D                                                             | 0.32                          | 0.57   | 0.25   | 0.3    | 0.33                   | 1                              | 0       | 3       | 3                           | 3 |
| 3   | 185529080 | rs1470579   | A   | C   | IGFBP2     | T2D                                                             | 0.33                          | 0.85   | 0.26   | 0.3    | 0.51                   | 6                              | 6       | 0       | 0                           | 5 |
| 6   | 20679709  | rs7756992   | A   | G   | CDKAL1     | T2D                                                             | 0.29                          | 0.63   | 0.47   | 0.28   | 0.07                   | 13                             | 0       | 1       | 0                           | 4 |
| 7   | 127251188 | rs712701    | T   | G   | PAX4       | T2D                                                             | 0.79                          | 0.73   | 0.36   | 0.78   | 0.67                   | 1                              | 0       | 5       | 2                           | 4 |
| 10  | 114808902 | rs12255372  | G   | T   | TCF7L2     | T2D                                                             | 0.32                          | 0.3    | 0.01   | 0.29   | 0.61                   | 0                              | 0       | 6       | 9                           | 4 |
| 11  | 2857194   | rs2237895   | A   | C   | KCNQ1      | T2D                                                             | 0.38                          | 0.15   | 0.33   | 0.42   | 0.35                   | 3                              | 2       | 0       | 0                           | 2 |
| 11  | 17408630  | rs5215      | C   | T   | KCNJ11     | T2D                                                             | 0.71                          | 0.95   | 0.66   | 0.65   | 0.50                   | 0                              | 3       | 0       | 2                           | 4 |
| 11  | 17409069  | rs5218      | G   | A   | KCNJ11     | T2D                                                             | 0.14                          | 0.03   | 0.51   | 0.32   | 0.15                   | 2                              | 0       | 9       | 0                           | 4 |
| 11  | 44280090  | rs729287    | C   | T   | ALX4       | T2D                                                             | 0.21                          | 0.06   | 0.45   | 0.27   | 0.22                   | 0                              | 10      | 0       | 4                           | 4 |
| 17  | 36047417  | rs3110641   | G   | A   | HNF1B      | T2D                                                             | 0.32                          | 0.59   | 0.23   | 0.26   | 0.55                   | 3                              | 0       | 5       | 0                           | 4 |
| 17  | 36098040  | rs4430796   | A   | G   | HNF1B      | T2D                                                             | 0.55                          | 0.69   | 0.28   | 0.48   | 0.45                   | 9                              | 0       | 7       | 0                           | 4 |
| 20  | 43058267  | rs147638455 | A   | G   | HNF4A      | T2D                                                             | 0.01                          | 0      | 0      | 0      | 0.00                   | 7                              | 0       | 0       | 0                           | 4 |
| 3   | 10328453  | rs4684677   | T   | A   | GHR        | Obesity                                                         | 0.03                          | 0.01   | 0.01   | 0.07   | 0.00                   | 0                              | 0       | 0       | 5                           | 3 |
| 5   | 148206440 | rs1042713   | G   | A   | ADRB2      | Obesity                                                         | 0.47                          | 0.52   | 0.55   | 0.39   | 0.34                   | 2                              | 0       | 5       | 0                           | 4 |
| 5   | 148206885 | rs1800888   | C   | T   | ADRB2      | Obesity                                                         | 0.02                          | 0      | 0      | 0.02   | 0.00                   | 0                              | 7       | 0       | 0                           | 3 |
| 5   | 149212243 | rs7732671   | G   | C   | PPARGC1B   | Obesity                                                         | 0.13                          | 0.18   | 0.06   | 0.08   | 0.00                   | 0                              | 0       | 5       | 0                           | 3 |
| 6   | 132212694 | rs7754561   | A   | G   | ENPP1      | Obesity                                                         | 0.52                          | 0.87   | 0.55   | 0.27   | 0.55                   | 2                              | 0       | 4       | 0                           | 3 |
| 8   | 37823798  | rs4994      | A   | G   | ADRB3      | Obesity                                                         | 0.07                          | 0.9    | 0.13   | 0.8    | 0.00                   | 12                             | 0       | 0       | 0                           | 4 |
| 16  | 53800954  | rs1421085   | T   | C   | FTO        | Obesity                                                         | 0.48                          | 0.06   | 0.17   | 0.43   | 0.00                   | 0                              | 0       | 0       | 4                           | 3 |
| 18  | 58039276  | rs2229616   | C   | T   | MC4R       | Obesity, autosomal dominant                                     | 0.00                          | 0.02   | 0.02   | 0.02   | 0.00                   | 0                              | 7       | 0       | 0                           | 5 |
| 16  | 67516945  | rs5030980   | C   | T   | AGRP       | Obesity, late-onset                                             | 0.08                          | 0.01   | 0      | 0.03   | 0.00                   | 0                              | 10      | 0       | 0                           | 5 |
| 3   | 12475557  | rs3856806   | C   | T   | PPARG      | Obesity, severe                                                 | 0.11                          | 0.05   | 0.21   | 0.12   | 0.07                   | 0                              | 8       | 0       | 0                           | 5 |
| 17  | 3397702   | rs12948217  | C   | T   | ASPA       | Canavan disease                                                 | 0.29                          | 0.23   | 0.05   | 0.31   | 0.55                   | 0                              | 3       | 0       | 2                           | 4 |
| 5   | 131676320 | rs1050152   | C   | T   | SLC22A4    | Celiac disease, Crohn's disease                                 | 0.33                          | 0.02   | 0      | 0.39   | 0.34                   | 0                              | 5       | 0       | 3                           | 3 |
| 14  | 81575005  | rs3783941   | C   | A   | TSHR       | Congenital Hypo Thyroidism                                      | 0.76                          | 0.64   | 0.39   | 0.67   | 0.75                   | 7                              | 2       | 0       | 0                           | 4 |
| 7   | 117199533 | rs213950    | G   | A   | CFTR       | Cystic fibrosis                                                 | 0.28                          | 0.93   | 0.39   | 0.44   | 0.21                   | 3                              | 0       | 6       | 0                           | 3 |
| 9   | 111651620 | rs3204145   | A   | T   | IKBKAP     | Dysautonomia, familial                                          | 0.17                          | 0.21   | 0.29   | 0.17   | 0.23                   | 4                              | 0       | 0       | 1                           | 2 |
| 1   | 169511755 | rs4524      | T   | C   | F5         | Factor V                                                        | 0.26                          | 0.17   | 0.25   | 0.25   | 0.52                   | 0                              | 4       | 0       | 4                           | 4 |
| 1   | 169519049 | rs6025      | T   | C   | F5         | Factor V                                                        | 0.08                          | 0      | 0      | 0.01   | 0.00                   | 0                              | 5       | 0       | 0                           | 2 |
| 16  | 3292874   | rs2741918   | C   | T   | MEFV       | Familial Mediterranean fever                                    | 0.57                          | 0.67   | 0.61   | 0.56   | 0.63                   | 0                              | 3       | 0       | 5                           | 4 |
| 16  | 3304463   | rs224222    | C   | T   | MEFV       | Familial Mediterranean fever                                    | 0.20                          | 0.04   | 0.03   | 0.28   | 0.08                   | 0                              | 13      | 0       | 2                           | 4 |
| 9   | 97873957  | rs4647534   | A   | G   | FANCC      | Fanconi anemia, complementation group C                         | 0.39                          | 0.6    | 0.63   | 0.45   | 0.40                   | 6                              | 0       | 2       | 0                           | 4 |
| 1   | 100316589 | rs2307130   | A   | G   | AGL        | Glycogen storage disease IIIB                                   | 0.40                          | 0.22   | 0.54   | 0.46   | 0.25                   | 8                              | 0       | 3       | 0                           | 5 |
| 8   | 19819724  | rs328       | C   | G   | LPL        | HDL cholesterol                                                 | 0.08                          | 0.06   | 0.12   | 0.13   | 0.29                   | 0                              | 10      | 6       | 0                           | 5 |
| 8   | 27373865  | rs751141    | G   | A   | EPHX2      | Hypercholesterolemia, familial, due to LDLR defect, modifier of | 0.05                          | 0.11   | 0.23   | 0.09   | 0.00                   | 0                              | 0       | 8       | 0                           | 4 |
| 5   | 42700044  | rs6179      | A   | G   | GHR        | Hypercholesterolemia, familial, modifier                        | 0.67                          | 0.4    | 0.82   | 0.68   | 0.21                   | 6                              | 0       | 1       | 0                           | 4 |
| 5   | 42719239  | rs6180      | A   | C   | GHR        | Hypercholesterolemia, familial, modifier                        | 0.47                          | 0.38   | 0.57   | 0.42   | 0.26                   | 2                              | 1       | 0       | 1                           | 3 |
| 11  | 17417496  | rs1800853   | G   | A   | ABCC8      | Hyperinsulinemic hypoglycemia, familial, 1                      | 0.02                          | 0.04   | 0.03   | 0.01   | 0.10                   | 1                              | 0       | 13      | 0                           | 5 |
| 7   | 113518434 | rs1799999   | C   | A   | PPP1R3A    | Insulin resistance, severe, digenic                             | 0.16                          | 0.18   | 0.64   | 0.12   | 0.00                   | 0                              | 6       | 0       | 0                           | 5 |
| 12  | 112939853 | rs3741983   | C   | T   | PTPN11     | Insulin resistance, susceptibility to                           | 0.27                          | 0.8    | 0.84   | 0.27   | 0.70                   | 0                              | 5       | 0       | 5                           | 4 |
| 19  | 11241915  | rs6413504   | A   | G   | LDLR       | LDL cholesterol                                                 | 0.50                          | 0.14   | 0.3    | 0.48   | 0.36                   | 10                             | 0       | 6       | 0                           | 5 |
| 4   | 38799710  | rs4833095   | T   | C   | TLR1       | Leprosy, immunity                                               | 0.49                          | 0.88   | 0.6    | 0.28   | 0.15                   | 0                              | 1       | 0       | 10                          | 5 |
| 1   | 100672060 | rs12021720  | T   | C   | DBT        | Maple syrup urine disease, type II                              | 0.89                          | 0.74   | 0.95   | 0.92   | 1.00                   | 0                              | 10      | 0       | 0                           | 4 |
| 15  | 72643444  | rs117160567 | A   | C   | HEXA       | Tay-Sachs disease                                               | 0.01                          | 0      | 0      | 0.02   | 0.00                   | 15                             | 0       | 0       | 0                           | 4 |
| 21  | 44480616  | rs1801181   | G   | A   | CBS        | Thrombosis, hyperhomocysteinemic                                | 0.34                          | 0.02   | 0.57   | 0.39   | 0.28                   | 3                              | 0       | 4       | 0                           | 3 |
| 10  | 56129066  | rs11594958  | A   | G   | PCDH15     | Usher syndrome, type 1F                                         | 0.25                          | 0.22   | 0.09   | 0.22   | 0.18                   | 6                              | 0       | 3       | 0                           | 4 |
| 1   | 68903942  | rs12145904  | C   | T   | RPE65      | Vitamin A metabolic defect                                      | 0.11                          | 0.23   | 0.36   | 0.13   | 0.14                   | 0                              | 5       | 0       | 1                           | 2 |
| 9   | 134385599 | rs2018621   | A   | G   | POMT1      | Walker-Warburg syndrome                                         | 0.94                          | 0.72   | 0.92   | 0.94   | 0.83                   | 1                              | 0       | 8       | 0                           | 5 |
| 14  | 77746310  | rs438931    | G   | A   | POMT2      | Walker-Warburg syndrome                                         | 0.09                          | 0.13   | 0.33   | 0.13   | 0.00                   | 0                              | 0       | 10      | 0                           | 4 |

**Table S3. Modeling Sidon\_BA as Levant\_N and an ancient population A.** Sidon\_BA can be modelled as a mix of Neolithic Levant  $0.484 \pm 0.042$  and Chalcolithic Iran  $0.516 \pm 0.042$  using a large number of outgroups: Ust\_Ishim, Kostenki14, MA1, Han, Papuan, Ami, Chukchi, Karitiana, Mbuti, Switzerland\_HG, EHG, WHG, and CHG.

| A                 | P-value for rank=1 | Mixture Proportions |        |            |
|-------------------|--------------------|---------------------|--------|------------|
|                   |                    | Levant_N            | A      | Std. Error |
| Iran_ChL          | 27.89E-02          | 0.484               | 0.516  | 0.042      |
| Iran_HotuIIIb     | 2.50E-02           | 0.593               | 0.407  | 0.048      |
| Iran_LN           | 2.45E-02           | 0.559               | 0.441  | 0.044      |
| Iran_recent       | 1.16E-02           | 0.309               | 0.691  | 0.089      |
| Natufian          | 0.94E-02           | 2.33                | -1.33  | 0.376      |
| Iran_N            | 0.45E-02           | 0.592               | 0.408  | 0.041      |
| Armenia_EBA       | 0.02E-02           | 0.528               | 0.472  | 0.046      |
| Anatolia_ChL      | 2.57E-07           | 0.324               | 0.676  | 0.123      |
| Armenia_MLBA      | 8.78E-11           | 0.653               | 0.347  | 0.052      |
| Europe_MNChL      | 6.11E-13           | 1.261               | -0.261 | 0.053      |
| Iberia_BA         | 3.82E-13           | 1.375               | -0.375 | 0.107      |
| Armenia_ChL       | 4.97E-14           | 0.692               | 0.308  | 0.063      |
| Europe_EN         | 5.73E-15           | 1.475               | -0.475 | 0.142      |
| SHG               | 3.50E-16           | 1.072               | -0.072 | 0.017      |
| Anatolia_N        | 6.71E-17           | 1.746               | -0.746 | 0.411      |
| Steppe_IA         | 4.02E-18           | 0.891               | 0.109  | 0.039      |
| Steppe_EMBA       | 7.68E-19           | 0.928               | 0.072  | 0.027      |
| Europe_LNBA       | 6.90E-20           | 1.053               | -0.053 | 0.04       |
| Steppe_Eneolithic | 5.79E-20           | 0.978               | 0.022  | 0.018      |
| Steppe_MLBA       | 2.71E-20           | 1.005               | -0.005 | 0.036      |

**Table S4. Counts of Y-chromosome ancestral and derived allele genotypes in the Sidon\_BA males**

| ERS1790733 observed genotypes |                             |                           | ERS1790732 observed genotypes |                             |                           |
|-------------------------------|-----------------------------|---------------------------|-------------------------------|-----------------------------|---------------------------|
| Haplogroup                    | Number of ancestral alleles | Number of derived alleles | Haplogroup                    | Number of ancestral alleles | Number of derived alleles |
| A00                           | 22                          | 0                         | A00                           | 26                          | 0                         |
| A0-T                          | 0                           | 7                         | A0-T                          | 0                           | 15                        |
| A0                            | 17                          | 0                         | A0                            | 12                          | 0                         |
| A1                            | 0                           | 4                         | A1                            | 0                           | 4                         |
| A1a                           | 8                           | 0                         | A1a                           | 7                           | 0                         |
| A1b                           | 1                           | 14                        | A1b                           | 1                           | 15                        |
| BT                            | 0                           | 121                       | BT                            | 0                           | 171                       |
| B                             | 1                           | 0                         | B                             | 1                           | 0                         |
| CT                            | 0                           | 73                        | CT                            | 1                           | 106                       |
| DE                            | 10                          | 0                         | DE                            | 13                          | 0                         |
| CF                            | 0                           | 2                         | CF                            | 0                           | 1                         |
| C                             | 2                           | 0                         | C                             | 5                           | 0                         |
| F                             | 0                           | 10                        | F                             | 0                           | 17                        |
| F1                            | 2                           | 0                         | F1                            | 2                           | 0                         |
| F3                            | 1                           | 0                         | F3                            | 1                           | 0                         |
| GHIJK                         | 0                           | 1                         | GHIJK                         | 0                           | 1                         |
| G                             | 70                          | 1                         | G                             | 81                          | 1                         |
| H                             | 8                           | 0                         | H                             | 10                          | 0                         |
| IJK                           | 0                           | 2                         | IJK                           | 0                           | 2                         |
| IJ                            | 0                           | 2                         | IJ                            | 0                           | 3                         |
| I                             | 51                          | 1                         | I                             | 63                          | 0                         |
| J                             | 0                           | 31                        | J                             | 0                           | 40                        |
| J1                            | 0                           | 1                         | J1                            | 1                           | 0                         |
| J2                            | 1                           | 0                         | J2                            | 0                           | 1                         |
| J1a                           | 0                           | 1                         | J1a                           | 1                           | 0                         |
| J2a                           | 2                           | 0                         | J2a                           | 3                           | 0                         |
| J2b                           | 2                           | 0                         | J2b                           | 0                           | 2                         |
| J1a3                          | 1                           | 0                         | J2b2a                         | 1                           | 0                         |
| J1a2a                         | 1                           | 0                         | J2b2a1                        | 1                           | 0                         |
| J1a2b                         | 0                           | 1                         | J2b2a1a                       | 1                           | 0                         |
| J1a2b3                        | 1                           | 0                         | J2b2a1a1                      | 1                           | 0                         |
| J1a2b3a                       | 1                           | 0                         |                               |                             |                           |



**Table S6: Modelling Lebanese as Sidon\_BA and an ancient population A.** Lebanese can be modelled as a mix of Bronze Age Sidon  $0.93 \pm 0.018$  and a steppe ancestry  $0.07 \pm 0.018$  using outgroups: Ust\_Ishim, Kostenki14, MA1, Han, Papuan, Ami, Chukchi, Karitiana, Mbuti, Switzerland\_HG, EHG, WHG, and CHG.

| A                 | P-value for rank=1 | Mixture Proportions |        |            |
|-------------------|--------------------|---------------------|--------|------------|
|                   |                    | Sidon_BA            | A      | Std. Error |
| Steppe_MLBA       | 9.49E-02           | 0.924               | 0.076  | 0.018      |
| Steppe_EMBA       | 9.48E-02           | 0.932               | 0.068  | 0.016      |
| Steppe_IA         | 9.28E-02           | 0.92                | 0.08   | 0.02       |
| Europe_LNBA       | 5.14E-02           | 0.927               | 0.073  | 0.019      |
| Steppe_Eneolithic | 5.14E-02           | 0.962               | 0.038  | 0.011      |
| Iran_LN           | 3.19E-02           | 1.16                | -0.16  | 0.063      |
| SHG               | 3.01E-02           | 0.972               | 0.028  | 0.008      |
| Iberia_BA         | 1.54E-02           | 0.934               | 0.066  | 0.022      |
| Iran_recent       | 1.24E-02           | 0.69                | 0.31   | 0.151      |
| Armenia_MLBA      | 1.04E-02           | 0.882               | 0.118  | 0.041      |
| Armenia_ChL       | 7.52E-03           | 0.887               | 0.113  | 0.042      |
| Iran_N            | 5.70E-03           | 1.104               | -0.104 | 0.055      |
| Natufian          | 3.93E-03           | 1.08                | -0.08  | 0.042      |
| Europe_MNChL      | 2.69E-03           | 0.962               | 0.038  | 0.019      |
| Anatolia_ChL      | 2.10E-03           | 0.881               | 0.119  | 0.087      |
| Mota              | 1.64E-03           | 1.007               | -0.007 | 0.004      |
| Europe_EN         | 1.51E-03           | 0.95                | 0.05   | 0.033      |
| Iran_ChL          | 1.15E-03           | 1.087               | -0.087 | 0.094      |
| Anatolia_N        | 7.98E-04           | 0.968               | 0.032  | 0.049      |
| Iran_Hotulllb     | 7.34E-04           | 1.023               | -0.023 | 0.068      |
| Armenia_EBA       | 6.77E-04           | 0.989               | 0.011  | 0.068      |

## Supplemental references

1. Lazaridis, I., Nadel, D., Rollefson, G., Merrett, D.C., Rohland, N., Mallick, S., Fernandes, D., Novak, M., Gamarra, B., Sirak, K., et al. (2016). Genomic insights into the origin of farming in the ancient Near East. *Nature* 536, 419-424.
2. Haber, M., Gauguier, D., Youhanna, S., Patterson, N., Moorjani, P., Botigue, L.R., Platt, D.E., Matisoo-Smith, E., Soria-Hernanz, D.F., Wells, R.S., et al. (2013). Genome-wide diversity in the levant reveals recent structuring by culture. *PLoS genetics* 9, e1003316.
3. Renaud, G., Slon, V., Duggan, A.T., and Kelso, J. (2015). Schmutzi: estimation of contamination and endogenous mitochondrial consensus calling for ancient DNA. *Genome biology* 16, 224.
4. Rasmussen, M., Guo, X., Wang, Y., Lohmueller, K.E., Rasmussen, S., Albrechtsen, A., Skotte, L., Lindgreen, S., Metspalu, M., Jombart, T., et al. (2011). An Aboriginal Australian genome reveals separate human dispersals into Asia. *Science* 334, 94-98.
