# Supplementary material for: Continuity and Admixture in the Last Five Millennia of Levantine History from Ancient Canaanite and Present-Day Lebanese Genome Sequences
Source: PubMed Central journal article supplement (PMC5544389; doi:10.1016/j.ajhg.2017.06.013), 2017-07-27
Supplement: mmc2.pdf [file mmc2.pdf]

# Continuity and Admixture in the Last Five Millennia of Levantine History from Ancient Canaanite and Present-Day Lebanese Genome Sequences

Marc Haber,<sup>1,9,\*</sup> Claude Doumet-Serhal,<sup>2,9</sup> Christiana Scheib,<sup>3,9</sup> Yali Xue,<sup>1</sup> Petr Danecek,<sup>1</sup> Massimo Mezzavilla,<sup>1</sup> Sonia Youhanna,<sup>4</sup> Rui Martiniano,<sup>1</sup> Javier Prado-Martinez,<sup>1</sup> Michał Szpak,<sup>1</sup> Elizabeth Matisoo-Smith,<sup>5</sup> Holger Schutkowski,<sup>6</sup> Richard Mikulski,<sup>6</sup> Pierre Zalloua,<sup>7,8</sup> Toomas Kivisild,<sup>3</sup> and Chris Tyler-Smith<sup>1,\*</sup>

The Canaanites inhabited the Levant region during the Bronze Age and established a culture that became influential in the Near East and beyond. However, the Canaanites, unlike most other ancient Near Easterners of this period, left few surviving textual records and thus their origin and relationship to ancient and present-day populations remain unclear. In this study, we sequenced five whole genomes from ~3,700-year-old individuals from the city of Sidon, a major Canaanite city-state on the Eastern Mediterranean coast. We also sequenced the genomes of 99 individuals from present-day Lebanon to catalog modern Levantine genetic diversity. We find that a Bronze Age Canaanite-related ancestry was widespread in the region, shared among urban populations inhabiting the coast (Sidon) and inland populations (Jordan) who likely lived in farming societies or were pastoral nomads. This Canaanite-related ancestry derived from mixture between local Neolithic populations and eastern migrants genetically related to Chalcolithic Iranians. We estimate, using linkage-disequilibrium decay patterns, that admixture occurred 6,600–3,550 years ago, coinciding with recorded massive population movements in Mesopotamia during the mid-Holocene. We show that present-day Lebanese derive most of their ancestry from a Canaanite-related population, which therefore implies substantial genetic continuity in the Levant since at least the Bronze Age. In addition, we find Eurasian ancestry in the Lebanese not present in Bronze Age or earlier Levantines. We estimate that this Eurasian ancestry arrived in the Levant around 3,750–2,170 years ago during a period of successive conquests by distant populations.

The Near East, including the Levant, has been central to human prehistory and history from the expansion out of Africa 50–60 thousand years ago (kya),<sup>1</sup> through post-glacial expansions<sup>2</sup> and the Neolithic transition 10 kya, to the historical period when Ancient Egyptians, Greeks, Phoenicians, Assyrians, Babylonians, Persians, Romans, and many others left their impact on the region.<sup>3</sup> Aspects of the genetic history of the Levant have been inferred from present-day DNA,<sup>4,5</sup> but the more comprehensive analyses performed in Europe<sup>6–11</sup> have shown the limitations of relying on present-day information alone and highlighted the power of ancient DNA (aDNA) for addressing questions about population histories.<sup>12</sup> Unfortunately, although the few aDNA results from the Levant available so far are sufficient to reveal how much its history differs from that of Europe,<sup>13</sup> more work is needed to establish a thorough understanding of Levantine genetic history. Such work is hindered by the hot and sometimes wet environment,<sup>12,13</sup> but improved aDNA technologies including use of the petrous bone as a source of DNA<sup>14</sup> and the rich archaeological remains available encouraged us to further explore the potential of aDNA in this region. Here, we present genome sequences from five Bronze Age Lebanese samples and show how they

improve our understanding of the Levant's history over the last five millennia.

During the Bronze Age in the Levant, around 3–4 kya, a distinctive culture emerged as a Semitic-speaking people known as the Canaanites. The Canaanites inhabited an area bounded by Anatolia to the north, Mesopotamia to the east, and Egypt to the south, with access to Cyprus and the Aegean through the Mediterranean. Thus the Canaanites were at the center of emerging Bronze Age civilizations and became politically and culturally influential.<sup>15</sup> They were later known to the ancient Greeks as the Phoenicians who, 2.3–3.5 kya, colonized territories throughout the Mediterranean reaching as far as the Iberian Peninsula.<sup>16</sup> However, for uncertain reasons but perhaps related to the use of papyrus instead of clay for documentation, few textual records have survived from the Canaanites themselves and most of their history known today has been reconstructed from ancient Egyptian and Greek records, the Hebrew Bible, and archaeological excavations.<sup>15</sup> Many uncertainties still surround the origin of the Canaanites. Ancient Greek historians believed their homeland was located in the region of the Persian Gulf,<sup>16,17</sup> but modern researchers tend to reject this hypothesis because of archaeological and historical evidence

<sup>1</sup>Wellcome Trust Sanger Institute, Wellcome Genome Campus, Hinxton, Cambridgeshire CB10 1SA, UK; <sup>2</sup>The Sidon excavation, Saida, Lebanon; <sup>3</sup>Department of Archaeology and Anthropology, University of Cambridge, Cambridge CB2 1QH, UK; <sup>4</sup>Institute of Physiology, University of Zurich, Winterthurerstrasse 190, 8057 Zurich, Switzerland; <sup>5</sup>Department of Anatomy, University of Otago, Dunedin 9054, New Zealand; <sup>6</sup>Department of Archaeology, Anthropology, and Forensic Science, Bournemouth University, Talbot Campus, Poole BH12 5BB, UK; <sup>7</sup>The Lebanese American University, Chouran, Beirut 1102 2801, Lebanon; <sup>8</sup>Harvard T.H. Chan School of Public Health, Boston, MA 02115, USA

<sup>9</sup>These authors contributed equally to this work

\*Correspondence: [mh25@sanger.ac.uk](mailto:mh25@sanger.ac.uk) (M.H.), [cts@sanger.ac.uk](mailto:cts@sanger.ac.uk) (C.T.-S.)

<http://dx.doi.org/10.1016/j.ajhg.2017.06.013>

© 2017 The Author(s). This is an open access article under the CC BY license (<http://creativecommons.org/licenses/by/4.0/>).

**Table 1. Samples Analyzed in This Study**

| ENA Number | Burial Number | Time Years Ago     | Mapped Reads <sup>a</sup> | Mapped Read % | Coverage Genomic | Coverage MT | Sex <sup>b</sup> | MT Haplogroup | Y Haplogroup |
|------------|---------------|--------------------|---------------------------|---------------|------------------|-------------|------------------|---------------|--------------|
| ERS1790733 | 54            | 3,700 <sup>c</sup> | 69,084,826                | 6.24          | 1.19             | 110         | M                | N1a3a         | J1-P58       |
| ERS1790732 | 63            | 3,650 <sup>d</sup> | 98,293,308                | 9.20          | 1.69             | 109         | M                | HV1b1         | J2-M12       |
| ERS1790730 | 65            | 3,650 <sup>d</sup> | 73,701,096                | 7.57          | 1.24             | 124         | F                | K1a2          | –            |
| ERS1790731 | 75            | 3,750 <sup>d</sup> | 128,355,897               | 15.48         | 2.32             | 164         | F                | R2            | –            |
| ERS1790729 | 46            | 3,750 <sup>d</sup> | 23,323,399                | 2.64          | 0.40             | 53          | F                | H1bc          | –            |

<sup>a</sup>Excluding PCR duplicates<sup>b</sup>Genetically determined<sup>c</sup>Radiocarbon date<sup>d</sup>Archaeological date

of population continuity through successive millennia in the Levant. The Canaanite culture is alternatively thought to have developed from local Chalcolithic people who were themselves derived from people who settled in farming villages 9–10 kya during the Neolithic period.<sup>15</sup> Uncertainties also surround the fate of the Canaanites: the Bible reports the destruction of the Canaanite cities and the annihilation of its people; if true, the Canaanites could not have directly contributed genetically to present-day populations. However, no archaeological evidence has so far been found to support widespread destruction of Canaanite cities between the Bronze and Iron Ages: cities on the Levant coast such as Sidon and Tyre show continuity of occupation until the present day.

aDNA research has the potential to resolve many questions related to the history of the Canaanites, including their place of origin and fate. Here, we sampled the petrous portion of temporal bones belonging to five ancient individuals dated to between 3,750 and 3,650 years ago (ya) from Sidon, which was a major Canaanite city-state during this period (Figures S1 and S2). We extracted DNA and built double-stranded libraries according to published protocols without uracil-DNA glycosylase treatment.<sup>18–21</sup> We sequenced the libraries on an Illumina HiSeq 2500 using 2× 75 bp reads and processed the sequences using the PALEOMIX pipeline.<sup>22</sup> We retained reads ≥30 bp and collapsed pairs with minimum overlap of 15 bp, allowing a mismatch rate of 0.06 between the pairs. We mapped the merged sequences to the *hs37d5* reference sequence, removed duplicates, removed two bases from the ends of each read, and randomly sampled a single sequence with a minimum quality of ≥20 to represent each SNP. We obtained a genomic coverage of 0.4–2.3× and a mitochondrial DNA (mtDNA) genome coverage of 53–164× (Table 1). Y chromosome genotypes were jointly called across males from the 1000 Genomes Project, present-day Lebanese, and two identified Canaanite males using FreeBayes v.0.9.18.<sup>23</sup> A maximum likelihood phylogeny was inferred using RAxML v.8.2.10<sup>24</sup> and visualized using iTOL v.3.5.3.<sup>25</sup> In order to assess ancient DNA authenticity, we estimated mtDNA and X chromosome contamination<sup>26–28</sup> (Table S1) and restricted some analyses to sequences with

aDNA damage patterns<sup>29,30</sup> (Figures S3 and S4), demonstrating that the sequence data we present are endogenous and minimally contaminated.

Additionally, we sequenced whole genomes of 99 present-day Lebanese individuals with informed consent to ~8× coverage on an Illumina HiSeq 2500 using 2× 100 bp reads in a study approved by The Wellcome Trust Sanger Institute's Human Materials and Data Management Committee (13/010 and 14/072). We merged the low-coverage Lebanese data with four high-coverage (30×) Lebanese samples,<sup>31</sup> 1000 Genomes Project phase 3 CEU, YRI, and CHB populations,<sup>32</sup> and sequence data previously published from regional populations (Egyptians, Ethiopians, and Greeks).<sup>1,31</sup> Raw calls were generated using bcftools (bcftools mpileup -C50 -pm3 -F0.2 -d10000 | bcftools call -mv, version 1.2-239-g8749475) and filtered to include only SNPs with the minimum of two alternate alleles in at least one population and site quality larger than ten; we excluded sites with a minimum per-population HWE and total HWE less than 0.01<sup>33</sup> and sites within 3 bp of an indel. The filtered calls were then pre-phased using shapeit (v.2.r790)<sup>34</sup> and their genotypes refined using beagle (v.4.1).<sup>35</sup> We have previously described the genetic structure in the Lebanese population using array data from ~1,300 individuals.<sup>4</sup> A principal component analysis (PCA) using the 99 sequenced present-day individuals show that they capture the previously described genetic diversity with distinct clusters reflecting the different cultural groups in Lebanon today (Figure S5).

We combined our ancient and modern samples with previously published ancient data<sup>6–11,13,36–38</sup> (Figure 1A) resulting in a dataset of 389 individuals and 1,046,317 SNPs when ancient and Lebanese samples were analyzed, and 546,891 SNPs when 2,583 modern samples from the Human Origins genotype data were included in the analysis (i.e., the small dataset was used only when a modern population other than the Lebanese was included in the test).<sup>9,39</sup> A pooled Lebanese sequence dataset (99 low coverage plus 4 high coverage) was used in all analyses except for the PCA and ADMIXTURE where a subset of 15 randomly selected individuals (5 from each group described in Figure S5) was used to avoid sample size

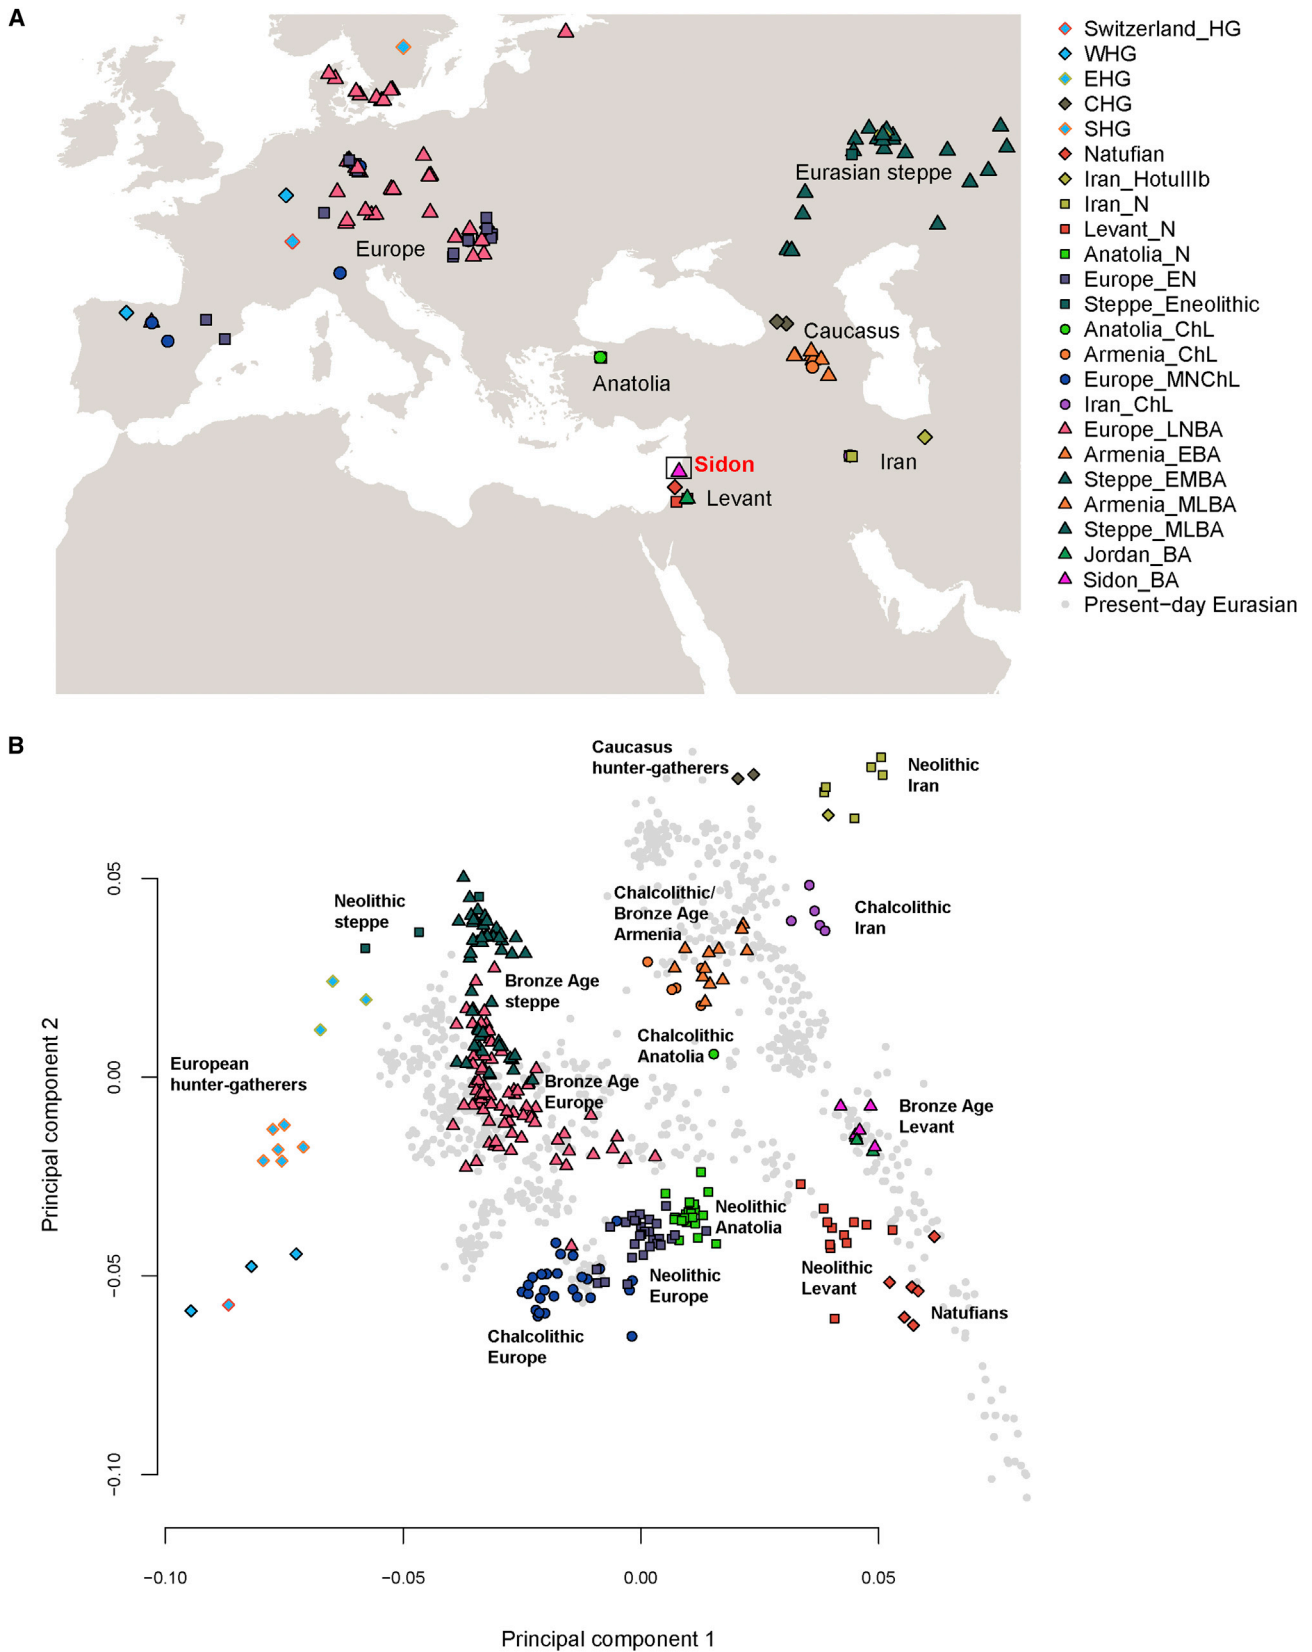

**Figure 1. Population Locations and Genetic Structure**

(A) The map shows the location of the newly sequenced Bronze Age Sidon samples (pink triangle labeled with red text), as well as the locations of published ancient samples used as comparative data in this study.

(B) PCA of ancient Eurasian samples (colored shapes) projected using eigenvectors from present-day Eurasian populations (gray points).

bias. The ancient samples were grouped following the labels assigned by Lazaridis et al.<sup>13</sup> on the basis of archaeological culture, chronology, and genetic clustering. We used this dataset to shed light on the genetic history of the Canaanites, resolving their relationship to other ancient populations and assessing their genetic contribution to present-day populations.

We first explored our dataset using PCA<sup>40</sup> on present-day West Eurasian (including Levantine) populations and projected the ancient samples onto this plot (Figures 1B and S6). The Bronze Age Sidon samples (Sidon\_BA) overlap with present-day Levantines and were positioned between the ancient Levantines (Natufians/Neolithic) and ancient Iranians (Neolithic/Chalcolithic). The overlap between the Bronze Age and present-day Levantines suggests a degree of genetic continuity in the region. We explored this further by computing the statistic  $f_4(\text{Lebanese, present-day Near Easterner; Sidon\_BA, Chimpanzee})$  using  $qpDstat$ <sup>39</sup> (with parameter  $f_4mode: YES$ ) and found that Sidon\_BA shared more alleles with the Lebanese than with most other present-day Levantines (Figure S7), supporting local population continuity as observed in Sidon's archaeological records. When we substituted present-day Near Easterners with a panel of 150 present-day populations available in the Human Origins dataset, we found that only Sardinians and Italian\_North shared significantly more alleles with Sidon\_BA compared with the Lebanese (Figure S8). Sardinians are known to have retained a large proportion of ancestry from Early European farmers (EEFs) and therefore the increased affinity to Sidon\_BA could be related to a shared Neolithic ancestry. We computed  $f_4(\text{Lebanese, Sardinian/Italian\_North; Sidon\_BA, Levant\_N})$  and found no evidence of increased affinity of Sardinians or Italian\_North to Sidon\_BA after the Neolithic (both Z-scores are positive). We next wanted to explore whether the increased affinity of Sidon\_BA to the Lebanese could also be observed when analyzing functionally important regions of the genome that are less susceptible to genetic drift. Our sequence data allowed us to scan loci linked to phenotypic traits and loci previously identified as functional variants in the Lebanese and other Levantines.<sup>41–43</sup> Using a list of 84 such variants (Table S2), we estimated the allele frequency (AF) in Sidon\_BA using ANGSD<sup>26</sup> based on a method from Li et al.<sup>44</sup> and calculated Pearson pairwise correlation coefficients between AF in Sidon\_BA and AF in Africans, Europeans, Asians,<sup>32</sup> and Lebanese. We found a high significant correlation between Sidon\_BA and the Lebanese ( $r = 0.74$ ; 95% CI = 0.63–0.82;  $p$  value =  $8.168 \times 10^{-16}$ ) and lower correlations between Sidon\_BA and Europeans ( $r = 0.56$ ), Africans ( $r = 0.55$ ), and Asians ( $r = 0.53$ ) (Figure S9). These results support population continuity in the region and suggest that several present-day genetic disorders might stem from risk alleles that were already present in the Bronze Age population. In addition, SNPs associated with phenotypic traits show that Sidon\_BA and the Lebanese had comparable skin, hair, and eye colors (in general:

light intermediate skin pigmentation, brown eyes, and dark hair) with similar frequencies of the underlying causal variants in *SLC24A5* and *HERC2*, but with Sidon\_BA probably having darker skin than Lebanese today from variants in *SLC45A2* resulting in darker pigmentation (Table S2).

The PCA shows that Sidon\_BA clusters with three individuals from Early Bronze Age Jordan (Jordan\_BA) found in a cave above the Neolithic site of 'Ain Ghazal and probably associated with an Early Bronze Age village close to the site.<sup>13</sup> This suggests that people from the highly differentiated urban culture on the Levant coast and inland people with different modes of subsistence were nevertheless genetically similar, supporting previous reports that the different cultural groups who inhabited the Levant during the Bronze Age, such as the Ammonites, Moabites, Israelites, and Phoenicians, each achieved their own cultural identities but all shared a common genetic and ethnic root with Canaanites.<sup>15</sup> Lazaridis et al.<sup>13</sup> reported that Jordan\_BA can be modeled as mixture of Neolithic Levant (Levant\_N) and Chalcolithic Iran (Iran\_ChL). We computed the statistic  $f_4(\text{Levant\_N, Sidon\_BA; Ancient Eurasian, Chimpanzee})$  and found that populations from the Caucasus and ancient Iran shared more alleles with Sidon\_BA than with Neolithic Levant (Figure 2A and S10). We then used  $qpAdm$ <sup>8</sup> (with parameter  $allsnps: YES$ ) to test whether Sidon\_BA can be modeled as mixture of Levant\_N and any other ancient population in the dataset and found good support for the model of Sidon\_BA being a mixture of Levant\_N ( $48.4\% \pm 4.2\%$ ) and Iran\_ChL ( $51.6\% \pm 4.2\%$ ) (Figure 2B; Table S3).

In addition, the two Sidon\_BA males carried the Y-chromosome haplogroups<sup>45</sup> J-P58 (J1a2b) and J-M12 (J2b) (Tables 1 and S4; Figure S11), both common male lineages in the Near East today. Haplogroup J-P58 is frequent in the Arabian peninsula with proposed origins in the Zagros/Taurus mountain region.<sup>46</sup> It forms the vast majority of the Y chromosomes in southwestern Mesopotamia and reaches particularly high frequencies (74.1%) in Marsh Arabs in Iraq.<sup>47</sup> On the other hand, haplogroup J-M12 is widespread at low frequency from the Balkans to India and the Himalayas, with Albanians having the highest proportions (14.3%).<sup>48</sup> We compiled frequencies of Y-chromosome haplogroups in this geographical area and their changes over time in a dataset of ancient and modern Levantine populations (Figure S12), and note, similarly to Lazaridis et al.,<sup>13</sup> that haplogroup J was absent in all Natufian and Neolithic Levant male individuals examined thus far, but emerged during the Bronze Age in Lebanon and Jordan along with ancestry related to Iran\_ChL. All five Sidon\_BA individuals had different mitochondrial DNA haplotypes<sup>49</sup> (Table 1), belonging to paragroups common in present-day Lebanon and nearby regions (Table S5) but with additional derived variants not observed in our present-day Lebanese dataset.

We next sought to estimate the time when the Iran\_ChL-related ancestry penetrated the Levant. Our



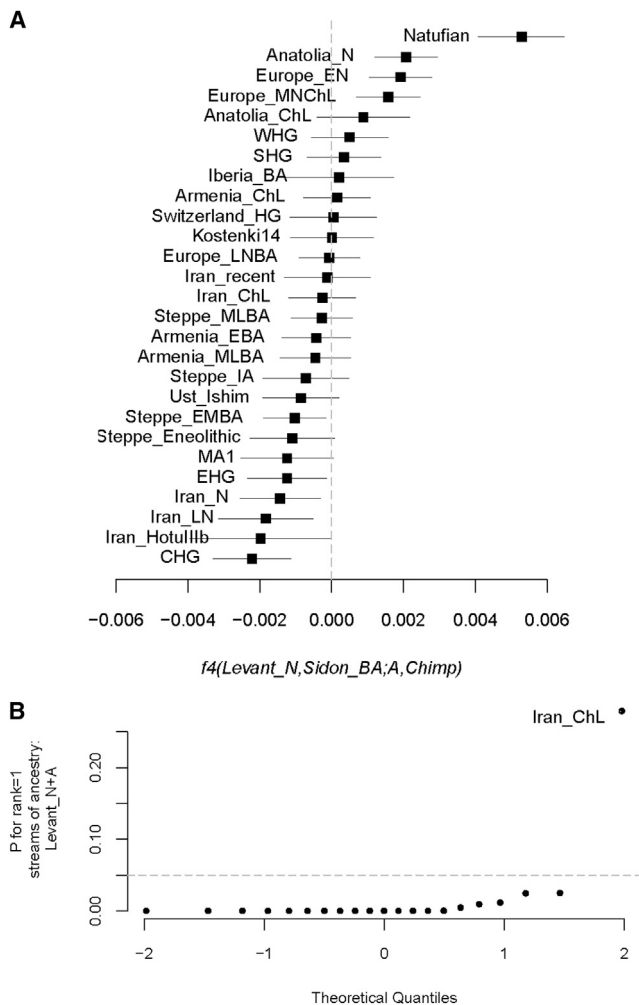

**Figure 2. Admixture in Bronze Age Levantine Populations**

(A) The statistic  $f_4(\text{Levant}_N, \text{Sidon\_BA}; \text{Ancient Eurasian}, \text{Chimpanzee})$  is most negative for ancient populations from the Caucasus and Iran, suggesting an increase in ancestry related to these populations in Sidon after the Neolithic period. The plot shows the estimated statistic value and  $\pm 3$  standard errors.

(B) Modeling Sidon as mixture between Neolithic Levant and an ancient Eurasian population shows that Chalcolithic Iran fits the model best when using a large number of outgroups: Ust\_Ishim, Kostenki14, MA1, Han, Papuan, Ami, Chukchi, Karitiana, Mbuti, Switzerland\_HG, EHG, WHG, and CHG. Sidon\_BA can then be modeled using  $qpAdm$  as  $0.484 \pm 0.042$  Levant\_N and  $0.516 \pm 0.042$  Iran\_ChL.

results support genetic continuity since the Bronze Age and thus our large dataset of present-day Lebanese provided an opportunity to explore the admixture time using admixture-induced linkage disequilibrium (LD) decay. Using ALDER<sup>50</sup> (with  $\text{mindis}: 0.005$ ), we set the Lebanese as the admixed test population and Natufians, Levant\_N, Sidon\_BA, Iran\_N, and Iran\_ChL as reference populations. To account for the small number of individuals in the reference populations and the limited number of SNPs in the dataset, we took a lenient minimum Z-score = 2 to be suggestive of admixture. The most significant result was for mixture of Levant\_N and Iran\_ChL ( $p = 0.013$ ) around  $181 \pm 54$  generations ago, or  $\sim 5,000 \pm 1,500$  ya assuming

a generation time of 28 years (Figure S13A). This admixture time, based entirely on genetic data, fits the known ages of the samples based on archaeological data since it falls between the dates of Sidon\_BA (3,650–3,750 ya) and Iran\_ChL (6,500–5,500 ya). The admixture time also overlaps with the rise and fall of the Akkadian Empire which controlled the region from Iran to the Levant between  $\sim 4.4$  and 4.2 kya. The Akkadian collapse is argued to have been the result of a widespread aridification event around 4,200 ya.<sup>51,52</sup> Archaeological evidence in this period documents large-scale influxes of refugees from Northern Mesopotamia toward the south, where cities and villages became overpopulated.<sup>53</sup> Our confidence intervals for the admixture dates are wide and therefore the historical links suggested here should be considered with caution. Future sampling of ancient DNA from northern Syria and Iraq will reveal whether these populations carried the Iran\_ChL-related ancestry and also provide a better understanding of the origin of the eastern migrants and the time when they arrived in the Levant.

Although  $f_4$  tests showed that present-day Lebanese share significantly more alleles with Sidon\_BA than other Near Eastern populations do, indicating genetic continuity, we failed to model the present-day Lebanese using streams of ancestry coming only from Levant\_N and Iran\_ChL ( $qpAdm$  rank1  $p = 8.36 \times 10^{-7}$ ), in contrast to our success with Sidon\_BA. We therefore further explored our dataset by running ADMIXTURE<sup>54</sup> in a supervised mode using Western hunter-gatherers (WHG), Eastern hunter-gatherers (EHG), Levant\_N, and Iran\_N as reference populations. These four populations have been previously<sup>13</sup> found to contribute genetically to most West Eurasians. The ADMIXTURE results replicate the findings from  $qpAdm$  for Sidon\_BA and show mixture of Levant\_N and ancient Iranian populations (Figure 3A). However, the present-day Lebanese, in addition to their Levant\_N and ancient Iranian ancestry, have a component (11%–22%) related to EHG and Steppe populations not found in Bronze Age populations (Figure 3A). We confirm the presence of this ancestry in the Lebanese by testing  $f_4(\text{Sidon\_BA}, \text{Lebanese}; \text{Ancient Eurasian}, \text{Chimpanzee})$  and find that Eurasian hunter-gatherers and Steppe populations share more alleles with the Lebanese than with Sidon\_BA (Figures 3B and S14). We next tested a model of the present-day Lebanese as a mixture of Sidon\_BA and any other ancient Eurasian population using  $qpAdm$ . We found that the Lebanese can be best modeled as Sidon\_BA  $93\% \pm 1.6\%$  and a Steppe Bronze Age population  $7\% \pm 1.6\%$  (Figure 3C; Table S6). To estimate the time when the Steppe ancestry penetrated the Levant, we used, as above, LD-based inference and set the Lebanese as admixed test population with Natufians, Levant\_N, Sidon\_BA, Steppe\_EMBA, and Steppe\_MLBA as reference populations. We found support ( $p = 0.00017$ ) for a mixture between Sidon\_BA and Steppe\_EMBA which has occurred around  $2,950 \pm 790$  ya (Figure S13B). It is important to note here that Bronze Age Steppe populations used in

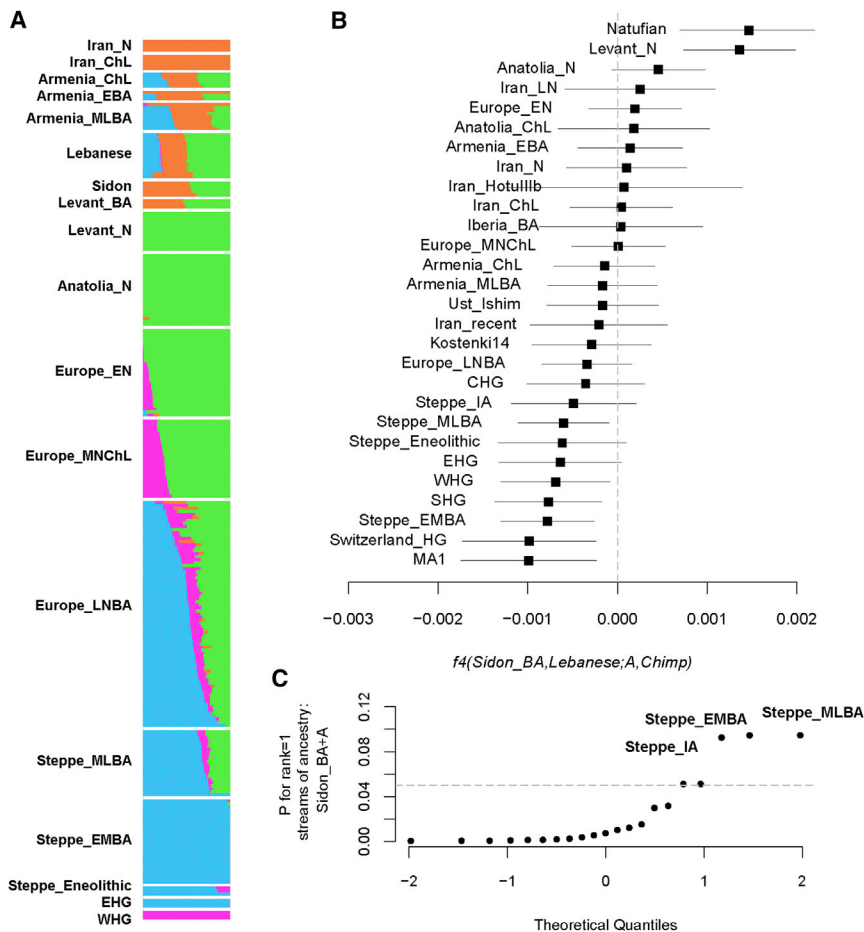

**Figure 3. Admixture in Present-Day Levantine Populations**

(A) Supervised ADMIXTURE using Levant\_N, Iran\_N, EHG, and WHG as reference populations. A Eurasian ancestry found in Eastern hunter-gatherers and the steppe Bronze Age appears in present-day Levantines after the Bronze Age.

(B) The statistic  $f_4(\text{Sidon\_BA, Lebanese; Ancient Eurasian, Chimpanzee})$  confirms the ADMIXTURE results and is most negative for populations from the steppe and Eurasian hunter-gatherers. We show the estimated statistic value and  $\pm 3$  standard errors.

(C) Present-day Lebanese can be modeled as mixture between Bronze Age Sidon and a steppe population. The model with mix proportions  $0.932 \pm 0.016$  Sidon\_BA and  $0.068 \pm 0.016$  steppe\_EMBA for Lebanese is supported with the lowest SE.

the model need not be the actual ancestral mixing populations, and the admixture could have involved a population which was itself admixed with a Steppe-like ancestry population. The time period of this mixture overlaps with the decline of the Egyptian empire and its domination over the Levant, leading some of the coastal cities to thrive, including Sidon and Tyre, which established at this time a successful maritime trade network throughout the Mediterranean. The decline in Egypt's power was also followed by a succession of conquests of the region by distant populations such as the Assyrians, Persians, and Macedonians, any or all of whom could have carried the Steppe-like ancestry observed here in the Levant after the Bronze Age.

In this report we have analyzed ancient whole-genome sequence data from a Levantine civilization and provided insights into how the Bronze Age Canaanites were related to other ancient populations and how they have contributed genetically to present-day ones (Figure 4). Many of our inferences rely on the limited number of ancient samples available, and we are only just beginning to reconstruct a genetic history of the Levant or the Near East as thoroughly as that of Europeans who, in comparison, have been extensively sampled. In the future, it will be important to examine samples from the Chalcolithic/Early Bronze Age Near East to understand the events leading to admixture between local populations and the eastern mi-

grants. It will also be important to analyze samples from the Iron Age to trace back the Steppe-like ancestry we find today in present-day Levantines. Our current results show that such studies are feasible.

### Accession Numbers

Sequencing data for 99 present-day Lebanese individuals reported in this paper are available through the European Genome-phenome Archive (EGA) under accession number EGA: EGAS00001002084. Raw sequencing reads for 5 ancient Canaanite individuals are available through the European Nucleotide Archive (ENA) under accession number ENA: PRJEB21330. Aligned sequences and genotypes can be obtained from the corresponding authors.

### Supplemental Data

Supplemental Data include 14 figures and 6 tables and can be found with this article online at <http://dx.doi.org/10.1016/j.ajhg.2017.06.013>.

### Acknowledgments

We thank the present-day donors who contributed their samples to this study and bioRxiv readers for helpful comments. M.H., Y.X., P.D., R.M., J.P.-M., M.S., and C.T.-S. were supported by The Wellcome Trust (098051).

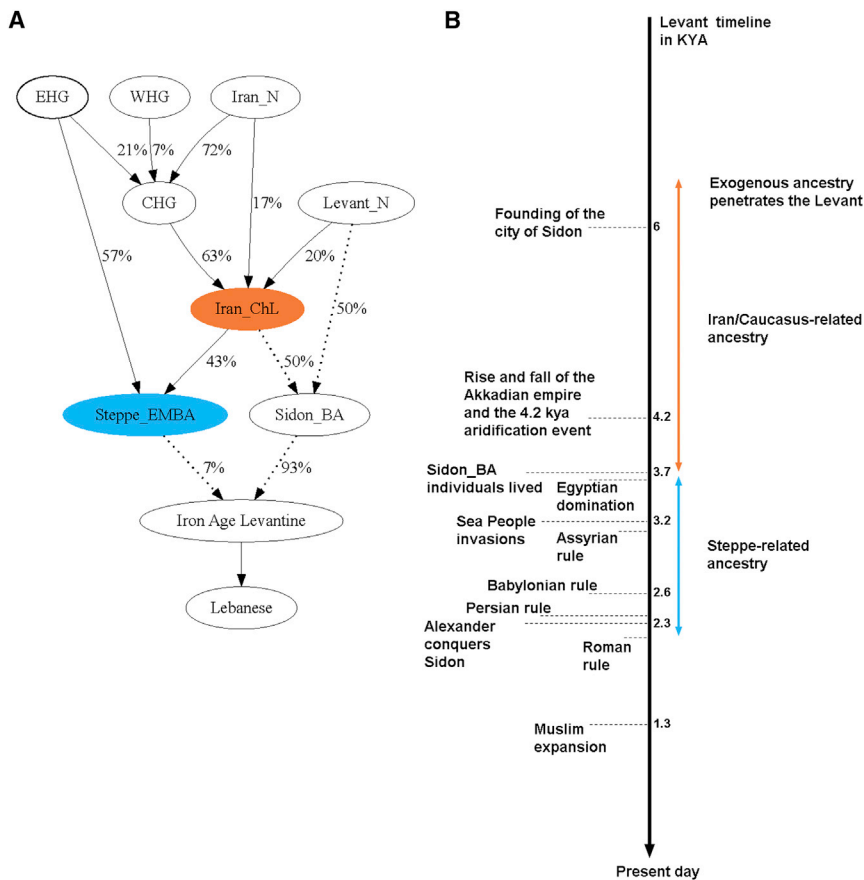

**Figure 4. Genetic History of the Levant**  
 (A) A model of population relationships which fits the *qpAdm* results from Lazaridis et al.<sup>13</sup> (solid arrows) and this study (dotted arrows). Percentages on arrows are the inferred admixture proportions.  
 (B) Levant timeline of historical events with genetically inferred admixture dates shown as colored double-ended arrows with length representing the SE.

Received: May 25, 2017  
 Accepted: June 27, 2017  
 Published: July 27, 2017

### Web Resources

European Genome-phenome Archive (EGA), <https://www.ebi.ac.uk/ega>  
 European Nucleotide Archive (ENA), <http://www.ebi.ac.uk/ena>

### References

- Pagani, L., Schiffels, S., Gurdasani, D., Danecek, P., Scally, A., Chen, Y., Xue, Y., Haber, M., Ekong, R., Oljira, T., et al. (2015). Tracing the route of modern humans out of Africa by using 225 human genome sequences from Ethiopians and Egyptians. *Am. J. Hum. Genet.* 96, 986–991.
- Platt, D.E., Haber, M., Dagher-Kharrat, M.B., Douaihy, B., Khazen, G., Ashrafiyan Bonab, M., Salloum, A., Mouzaya, F., Luiselli, D., Tyler-Smith, C., et al. (2017). Mapping post-glacial expansions: the peopling of Southwest Asia. *Sci. Rep.* 7, 40338.
- Hitti, P.K. (1967). *Lebanon in History: From the Earliest Times to the Present* (London: Macmillan).
- Haber, M., Gauguier, D., Youhanna, S., Patterson, N., Moorjani, P., Botigué, L.R., Platt, D.E., Matisoo-Smith, E., Soria-Hernanz, D.F., Wells, R.S., et al. (2013). Genome-wide diversity in the levant reveals recent structuring by culture. *PLoS Genet.* 9, e1003316.
- Zalloua, P.A., Platt, D.E., El Sibai, M., Khalife, J., Makhoul, N., Haber, M., Xue, Y., Izaabel, H., Bosch, E., Adams, S.M., et al.;

Genographic Consortium (2008). Identifying genetic traces of historical expansions: Phoenician footprints in the Mediterranean. *Am. J. Hum. Genet.* 83, 633–642.

- Allentoft, M.E., Sikora, M., Sjögren, K.G., Rasmussen, S., Rasmussen, M., Stenderup, J., Damgaard, P.B., Schroeder, H., Ahlström, T., Vinner, L., et al. (2015). Population genomics of Bronze Age Eurasia. *Nature* 522, 167–172.
- Günther, T., Valdiosera, C., Malmström, H., Ureña, I., Rodriguez-Varela, R., Sverrisdóttir, O.O., Daskalaki, E.A., Skoglund, P., Naidoo, T., Svensson, E.M., et al. (2015). Ancient genomes link early farmers from Atapuerca in Spain to modern-day Basques. *Proc. Natl. Acad. Sci. USA* 112, 11917–11922.
- Haak, W., Lazaridis, I., Patterson, N., Rohland, N., Mallick, S., Llamas, B., Brandt, G., Nordenfelt, S., Harney, E., Stewardson, K., et al. (2015). Massive migration from the steppe was a source for Indo-European languages in Europe. *Nature* 522, 207–211.
- Lazaridis, I., Patterson, N., Mittnik, A., Renaud, G., Mallick, S., Kirsanow, K., Sudmant, P.H., Schraiber, J.G., Castellano, S., Lipson, M., et al. (2014). Ancient human genomes suggest three ancestral populations for present-day Europeans. *Nature* 513, 409–413.
- Mathieson, I., Lazaridis, I., Rohland, N., Mallick, S., Patterson, N., Roodenberg, S.A., Harney, E., Stewardson, K., Fernandes, D., Novak, M., et al. (2015). Genome-wide patterns of selection in 230 ancient Eurasians. *Nature* 528, 499–503.
- Olalde, I., Schroeder, H., Sandoval-Velasco, M., Vinner, L., Lobón, I., Ramirez, O., Civit, S., García Borja, P., Salazar-García, D.C., Talamo, S., et al. (2015). A common genetic origin

- for early farmers from Mediterranean Cardial and Central European LBK cultures. *Mol. Biol. Evol.* 32, 3132–3142.
12. Haber, M., Mezzavilla, M., Xue, Y., and Tyler-Smith, C. (2016). Ancient DNA and the rewriting of human history: be sparing with Occam's razor. *Genome Biol.* 17, 1.
  13. Lazaridis, I., Nadel, D., Rollefson, G., Merrett, D.C., Rohland, N., Mallick, S., Fernandes, D., Novak, M., Gamarra, B., Sirak, K., et al. (2016). Genomic insights into the origin of farming in the ancient Near East. *Nature* 536, 419–424.
  14. Gamba, C., Jones, E.R., Teasdale, M.D., McLaughlin, R.L., Gonzalez-Fortes, G., Mattiangeli, V., Domboróczki, L., Kóvári, I., Pap, I., Anders, A., et al. (2014). Genome flux and stasis in a five millennium transect of European prehistory. *Nat. Commun.* 5, 5257.
  15. Tubb, J.N. (1998). *Canaanites* (London: Published for the Trustees of the British Museum by British Museum Press).
  16. Markoe, G. (2000). *Phoenicians* (London: British Museum Press).
  17. Al Khalifa, H.A.S., and Rice, M. (1986). *Bahrain through the Ages: The Archaeology* (London: KPI).
  18. Meyer, M., and Kircher, M. (2010). Illumina sequencing library preparation for highly multiplexed target capture and sequencing. *Cold Spring Harb. Protoc.* 2010, t5448.
  19. Dabney, J., Knapp, M., Glocke, I., Gansauge, M.T., Weihmann, A., Nickel, B., Valdiosera, C., García, N., Pääbo, S., Arsuaga, J.L., and Meyer, M. (2013). Complete mitochondrial genome sequence of a Middle Pleistocene cave bear reconstructed from ultrashort DNA fragments. *Proc. Natl. Acad. Sci. USA* 110, 15758–15763.
  20. Rasmussen, M., Anzick, S.L., Waters, M.R., Skoglund, P., DeGiorgio, M., Stafford, T.W., Jr., Rasmussen, S., Moltke, I., Albrechtsen, A., Doyle, S.M., et al. (2014). The genome of a Late Pleistocene human from a Clovis burial site in western Montana. *Nature* 506, 225–229.
  21. Pinhasi, R., Fernandes, D., Sirak, K., Novak, M., Connell, S., Alpaslan-Roodenberg, S., Gerritsen, F., Moiseyev, V., Gromov, A., Raczky, P., et al. (2015). Optimal ancient DNA yields from the inner ear part of the human petrous bone. *PLoS ONE* 10, e0129102.
  22. Schubert, M., Ermini, L., Der Sarkissian, C., Jónsson, H., Ginolhac, A., Schaefer, R., Martin, M.D., Fernández, R., Kircher, M., McCue, M., et al. (2014). Characterization of ancient and modern genomes by SNP detection and phylogenomic and metagenomic analysis using PALEOMIX. *Nat. Protoc.* 9, 1056–1082.
  23. Garrison, E., and Marth, G. (2012). Haplotype-based variant detection from short-read sequencing. *arXiv. arXiv:1207.3907 [q-bio.GN]*. <https://arxiv.org/abs/1207.3907>.
  24. Stamatakis, A. (2014). RAxML version 8: a tool for phylogenetic analysis and post-analysis of large phylogenies. *Bioinformatics* 30, 1312–1313.
  25. Letunic, I., and Bork, P. (2016). Interactive tree of life (iTOL) v3: an online tool for the display and annotation of phylogenetic and other trees. *Nucleic Acids Res.* 44 (W1), W242–W245.
  26. Korneliusen, T.S., Albrechtsen, A., and Nielsen, R. (2014). ANGSD: Analysis of Next Generation Sequencing Data. *BMC Bioinformatics* 15, 356.
  27. Rasmussen, M., Guo, X., Wang, Y., Lohmueller, K.E., Rasmussen, S., Albrechtsen, A., Skotte, L., Lindgreen, S., Metspalu, M., Jombart, T., et al. (2011). An Aboriginal Australian genome reveals separate human dispersals into Asia. *Science* 334, 94–98.
  28. Renaud, G., Slon, V., Duggan, A.T., and Kelso, J. (2015). Schmutzi: estimation of contamination and endogenous mitochondrial consensus calling for ancient DNA. *Genome Biol.* 16, 224.
  29. Skoglund, P., Northoff, B.H., Shunkov, M.V., Derevianko, A.P., Pääbo, S., Krause, J., and Jakobsson, M. (2014). Separating endogenous ancient DNA from modern day contamination in a Siberian Neandertal. *Proc. Natl. Acad. Sci. USA* 111, 2229–2234.
  30. Skoglund, P., Posth, C., Sirak, K., Spriggs, M., Valentin, F., Bedford, S., Clark, G.R., Reepmeyer, C., Petchey, F., Fernandes, D., et al. (2016). Genomic insights into the peopling of the South-west Pacific. *Nature* 538, 510–513.
  31. Haber, M., Mezzavilla, M., Bergström, A., Prado-Martinez, J., Hallast, P., Saif-Ali, R., Al-Habori, M., Dedoussis, G., Zeggini, E., Blue-Smith, J., et al. (2016). Chad genetic diversity reveals an African history marked by multiple Holocene Eurasian migrations. *Am. J. Hum. Genet.* 99, 1316–1324.
  32. The 1000 Genomes Project Consortium (2015). A global reference for human genetic variation. *Nature* 526, 68–74.
  33. Wigginton, J.E., Cutler, D.J., and Abecasis, G.R. (2005). A note on exact tests of Hardy-Weinberg equilibrium. *Am. J. Hum. Genet.* 76, 887–893.
  34. Delaneau, O., Marchini, J., and Zagury, J.F. (2011). A linear complexity phasing method for thousands of genomes. *Nat. Methods* 9, 179–181.
  35. Browning, B.L., and Browning, S.R. (2016). Genotype imputation with millions of reference samples. *Am. J. Hum. Genet.* 98, 116–126.
  36. Jones, E.R., Gonzalez-Fortes, G., Connell, S., Siska, V., Eriksson, A., Martiniano, R., McLaughlin, R.L., Gallego Llorente, M., Cassidy, L.M., Gamba, C., et al. (2015). Upper Palaeolithic genomes reveal deep roots of modern Eurasians. *Nat. Commun.* 6, 8912.
  37. Fu, Q., Li, H., Moorjani, P., Jay, F., Slepchenko, S.M., Bondarev, A.A., Johnson, P.L., Aximu-Petri, A., Prüfer, K., de Filippo, C., et al. (2014). Genome sequence of a 45,000-year-old modern human from western Siberia. *Nature* 514, 445–449.
  38. Raghavan, M., Skoglund, P., Graf, K.E., Metspalu, M., Albrechtsen, A., Moltke, I., Rasmussen, S., Stafford, T.W., Jr., Orlando, L., Metspalu, E., et al. (2014). Upper Palaeolithic Siberian genome reveals dual ancestry of Native Americans. *Nature* 505, 87–91.
  39. Patterson, N., Moorjani, P., Luo, Y., Mallick, S., Rohland, N., Zhan, Y., Genschoreck, T., Webster, T., and Reich, D. (2012). Ancient admixture in human history. *Genetics* 192, 1065–1093.
  40. Patterson, N., Price, A.L., and Reich, D. (2006). Population structure and eigenanalysis. *PLoS Genet.* 2, e190.
  41. Nakouzi, G., Kreidieh, K., and Yazbek, S. (2015). A review of the diverse genetic disorders in the Lebanese population: highlighting the urgency for community genetic services. *J. Community Genet.* 6, 83–105.
  42. Hager, J., Kamatani, Y., Cazier, J.B., Youhanna, S., Ghassibe-Sabbagh, M., Platt, D.E., Abchee, A.B., Romanos, J., Khazen, G., Othman, R., et al.; FGENTCARD Consortium (2012). Genome-wide association study in a Lebanese cohort confirms PHACTR1 as a major determinant of coronary artery stenosis. *PLoS ONE* 7, e38663.
  43. Ghassibe-Sabbagh, M., Haber, M., Salloum, A.K., Al-Sarraj, Y., Akle, Y., Hirbli, K., Romanos, J., Mouzaya, F., Gauguier, D., Platt, D.E., et al. (2014). T2DM GWAS in the Lebanese



- population confirms the role of TCF7L2 and CDKAL1 in disease susceptibility. *Sci. Rep.* *4*, 7351.
44. Li, Y., Vinckenbosch, N., Tian, G., Huerta-Sanchez, E., Jiang, T., Jiang, H., Albrechtsen, A., Andersen, G., Cao, H., Korneliusen, T., et al. (2010). Resequencing of 200 human exomes identifies an excess of low-frequency non-synonymous coding variants. *Nat. Genet.* *42*, 969–972.
  45. Poznik, G.D. (2016). Identifying Y-chromosome haplogroups in arbitrarily large samples of sequenced or genotyped men. *bioRxiv*. <http://dx.doi.org/10.1101/088716>.
  46. Chiaroni, J., King, R.J., Myres, N.M., Henn, B.M., Ducourneau, A., Mitchell, M.J., Boetsch, G., Sheikha, I., Lin, A.A., Nik-Ahd, M., et al. (2010). The emergence of Y-chromosome haplogroup J1e among Arabic-speaking populations. *Eur. J. Hum. Genet.* *18*, 348–353.
  47. Al-Zahery, N., Pala, M., Battaglia, V., Grugni, V., Hamod, M.A., Hooshiar Kashani, B., Olivieri, A., Torrioni, A., Santachiara-Benerecetti, A.S., and Semino, O. (2011). In search of the genetic footprints of Sumerians: a survey of Y-chromosome and mtDNA variation in the Marsh Arabs of Iraq. *BMC Evol. Biol.* *11*, 288.
  48. Semino, O., Magri, C., Benuzzi, G., Lin, A.A., Al-Zahery, N., Battaglia, V., Maccioni, L., Triantaphyllidis, C., Shen, P., Oefner, P.J., et al. (2004). Origin, diffusion, and differentiation of Y-chromosome haplogroups E and J: inferences on the neolithization of Europe and later migratory events in the Mediterranean area. *Am. J. Hum. Genet.* *74*, 1023–1034.
  49. Weissensteiner, H., Forer, L., Fuchsberger, C., Schöpf, B., Kloss-Brandstätter, A., Specht, G., Kronenberg, F., and Schönherr, S. (2016). mtDNA-Server: next-generation sequencing data analysis of human mitochondrial DNA in the cloud. *Nucleic Acids Res.* *44* (W1), W64–W69.
  50. Loh, P.R., Lipson, M., Patterson, N., Moorjani, P., Pickrell, J.K., Reich, D., and Berger, B. (2013). Inferring admixture histories of human populations using linkage disequilibrium. *Genetics* *193*, 1233–1254.
  51. Cullen, H.M., deMenoca, P.B., Hemming, S., Hemming, G., Brown, F.H., Guilderson, T., and Sirocko, F. (2000). Climate change and the collapse of the Akkadian empire: Evidence from the deep sea. *Geology* *28*, 4.
  52. deMenocal, P.B. (2001). Cultural responses to climate change during the late Holocene. *Science* *292*, 667–673.
  53. Weiss, H., Courty, M.A., Wetterstrom, W., Guichard, F., Senior, L., Meadow, R., and Curnow, A. (1993). The genesis and collapse of third millennium north mesopotamian civilization. *Science* *261*, 995–1004.
  54. Alexander, D.H., Novembre, J., and Lange, K. (2009). Fast model-based estimation of ancestry in unrelated individuals. *Genome Res.* *19*, 1655–1664.

**The American Journal of Human Genetics, Volume 101**

**Supplemental Data**

**Continuity and Admixture in the Last Five Millennia  
of Levantine History from Ancient Canaanite  
and Present-Day Lebanese Genome Sequences**

**Marc Haber, Claude Doumet-Serhal, Christiana Scheib, Yali Xue, Petr Danecek, Massimo Mezzavilla, Sonia Youhanna, Rui Martiniano, Javier Prado-Martinez, Michał Szpak, Elizabeth Matisoo-Smith, Holger Schutkowski, Richard Mikulski, Pierre Zalloua, Toomas Kivisild, and Chris Tyler-Smith**

## Supplementary materials

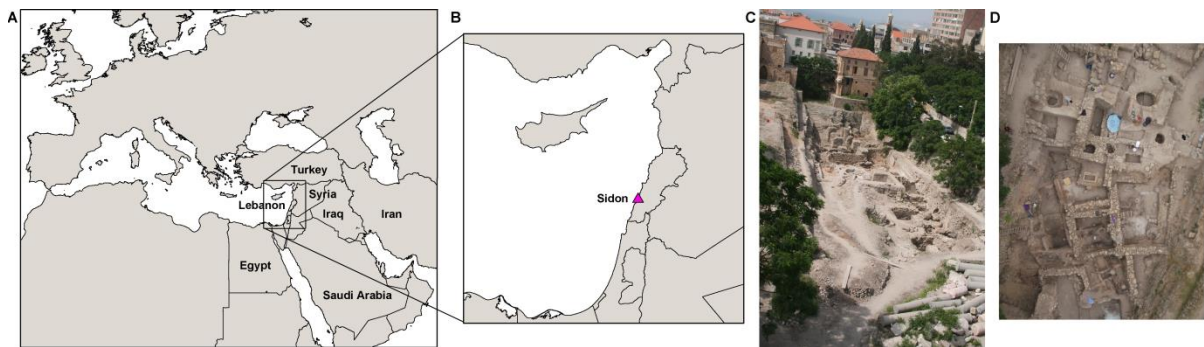

**Figure S1. The Sidon excavation site.** (A) Map shows the location of Lebanon with present-day political borders in the Near East. (B) A magnification showing the Levant region and the location of the city of Sidon. (C) Photo shows the Sidon excavation site which included the burials of individuals studied here. (D) Aerial view of excavation details from Season 12 (Bronze Age structures).

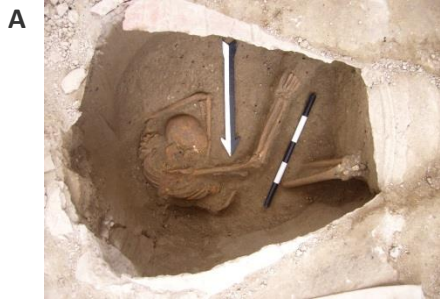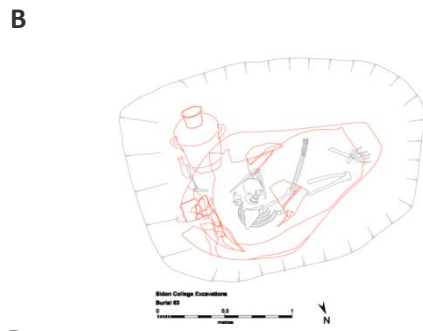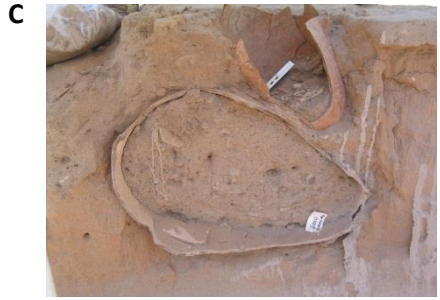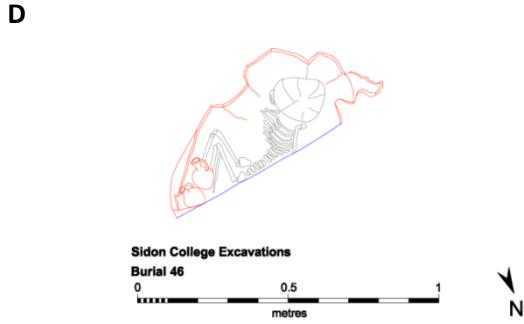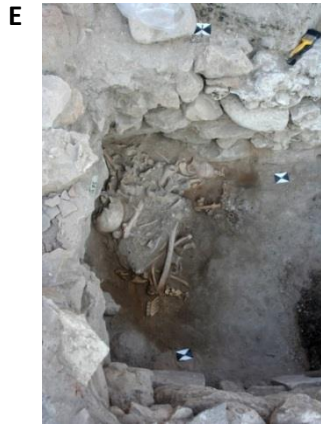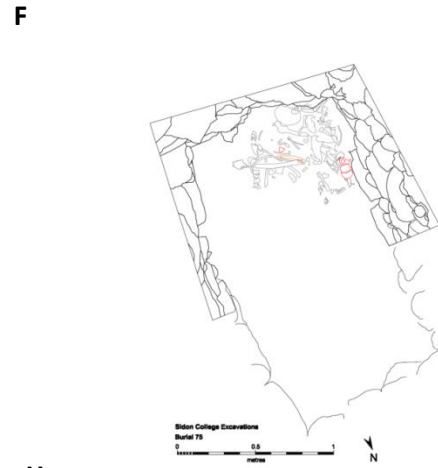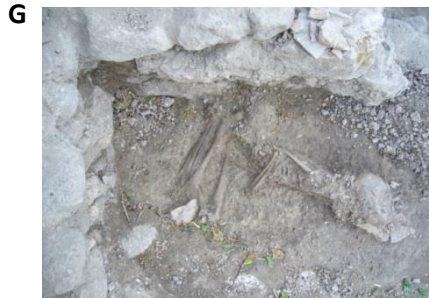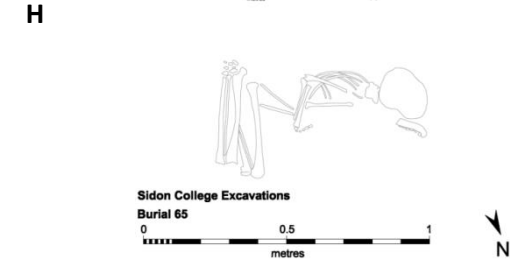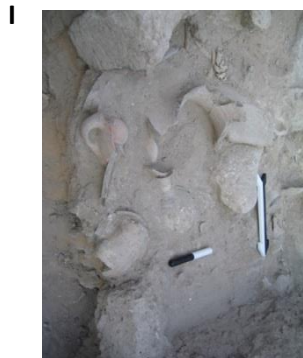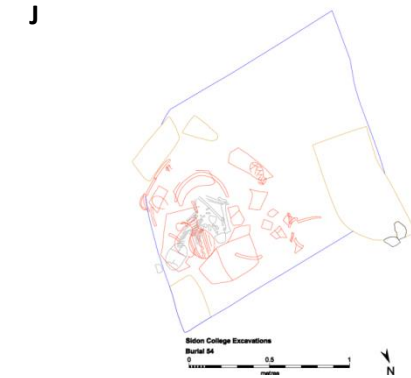



**Figure S2. Burials of individuals analysed in this study.** (A) and (B) burial 63: Stratum 6 Middle Bronze Age II B about 1600 BC. Consisted of an unusually large burial containing the remains of at least two individuals. (C) and (D) burial 46: Intermediate Middle Bronze Age II A-B about 1750 BC. This burial consisted of a jar burial containing an infant. (E) and (F) burial 75: Intermediate Middle Bronze Age II A-B about 1750 BC. It contained the commingled remains of 3 individuals. (G) and (H) burial 65: Stratum 6 Middle Bronze Age II B about 1600 BC. This burial consisted of a simple unlined burial of a single sub adult individual. (I) and (J) burial 54: Middle Bronze Age II B around about 1650 BC. This jar consisted of the burial of a sub adult, probably 8-12 years old.

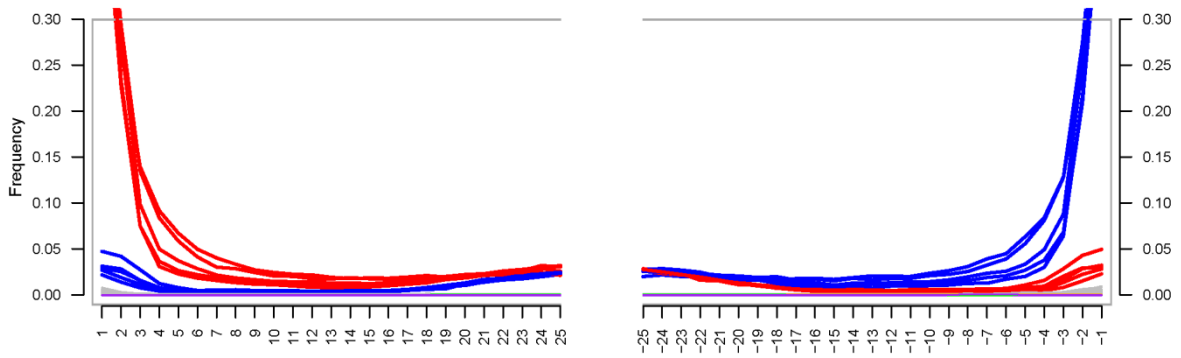

**Figure S3. Post-mortem damage patterns.** Base substitutions C>T from the 5' (left) and G>A from the 3' end (right) for all Sidon samples show patterns typical of ancient DNA damage.

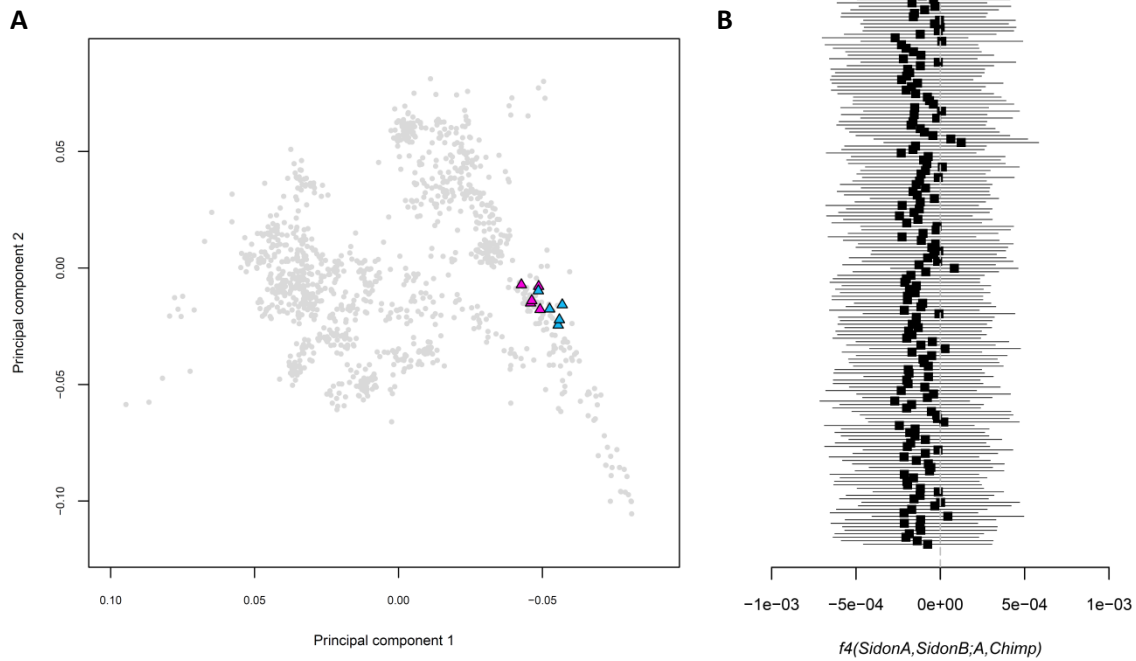

**Figure S4. Testing for contamination using sequences with evidence of post-mortem damage (PMD).** (A) PCA is similar to Figure 1 but additionally includes the ancient individuals represented only by sequences with a PMD score of at least 3 (blue triangles) to remove potentially contaminating sequences from present-day individuals. The samples overlap samples with no damage-restriction (pink triangles). (B)  $f_4$  statistics testing if a modern population  $A$  in the dataset has excess affinity to samples with no damage-restriction ( $SidonB$ ) compared with  $SidonA$  represented only by sequences with a PMD score  $>3$ . Tests for all modern populations do not significantly deviate from zero. The PCA and  $f_4$  statistics suggest the Sidon DNA samples are authentic and minimally contaminated.

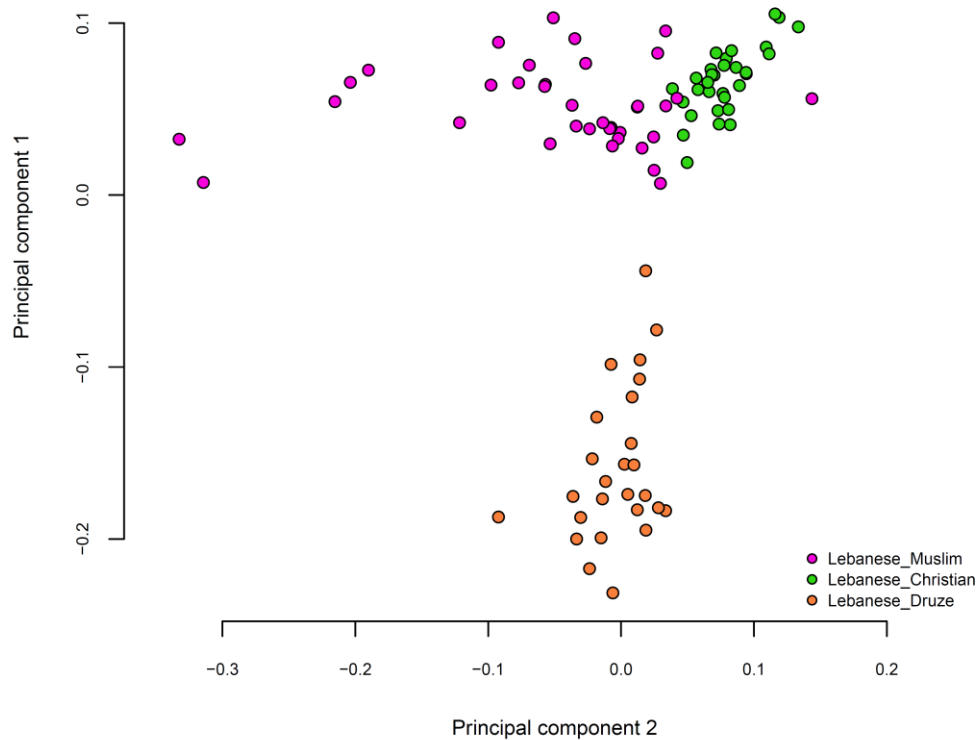

**Figure S5. Genetic structure in present-day Lebanese.** Principal components analysis of 99 present-day Lebanese sequenced in this study. We used the *smartpca* program of EIGENSOFT on SNPs overlapping with the 1.2M SNPs from Lazaridis et al. 2016<sup>1</sup> and set *killr2*: YES, *r2thresh*: 0.7, *outliersigmathresh*: 5. The genetic diversity of the sequenced Lebanese captures the previously-described genetic diversity in Lebanon<sup>2</sup> using a set with a larger sample size (1341) and array data.



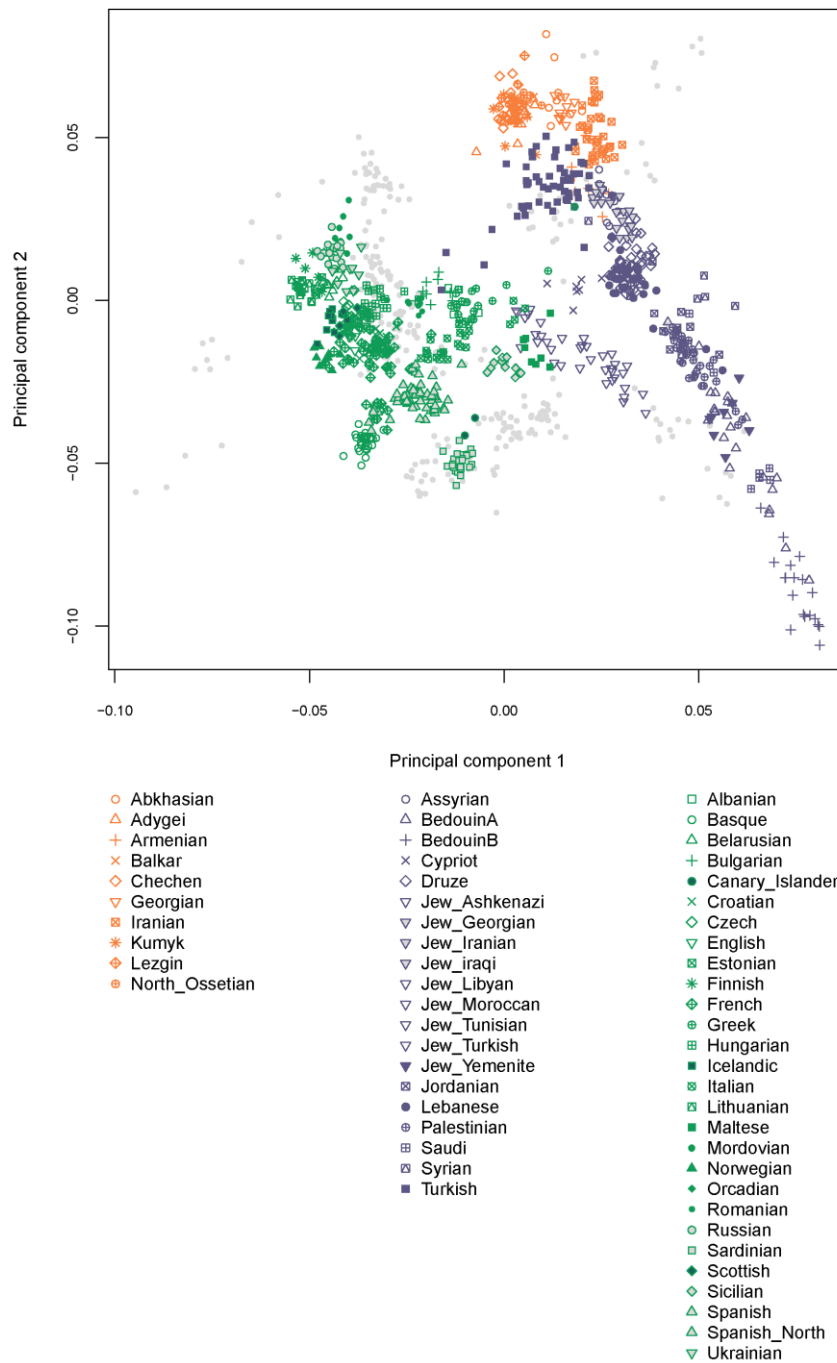

**Figure S6. PCA showing the position of present-day populations.** The gray points represent the projected ancient samples shown in Figure1.

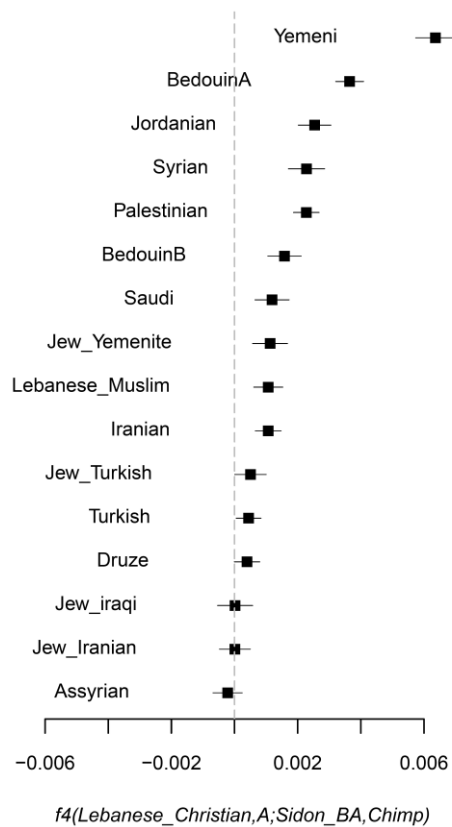

**Figure S7. Testing Sidon\_BA affinity to present-day Near Easterners.** The statistic  $f_4(\text{Lebanese\_Christian}, \text{Test}; \text{Sidon\_BA}, \text{Chimpanzee})$  is significantly positive for most populations when *Test* is a present-day Near Easterner, indicating Sidon\_BA shares more alleles with the Lebanese than with other Near Easterners. We chose Lebanese\_Christian to represent present-day Lebanese in this test as this population has been shown to be relatively isolated and had no significant admixture in recent times with neighbouring populations. In this and following figures we plot the  $f_4$  statistic value and  $\pm 3$  standard errors.

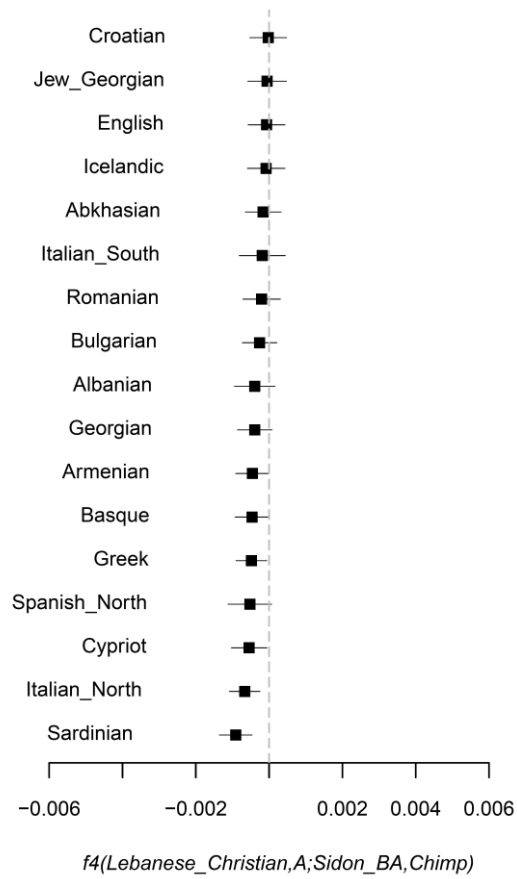

**Figure S8. Testing Sidon\_BA affinity to worldwide populations.** The plot shows all the negative statistics from  $f_4(\text{Lebanese\_Christian}, \text{Test}; \text{Sidon\_BA}, \text{Chimpanzee})$  when *Test* is one of the 150 present-day populations available in the Human Origins dataset.

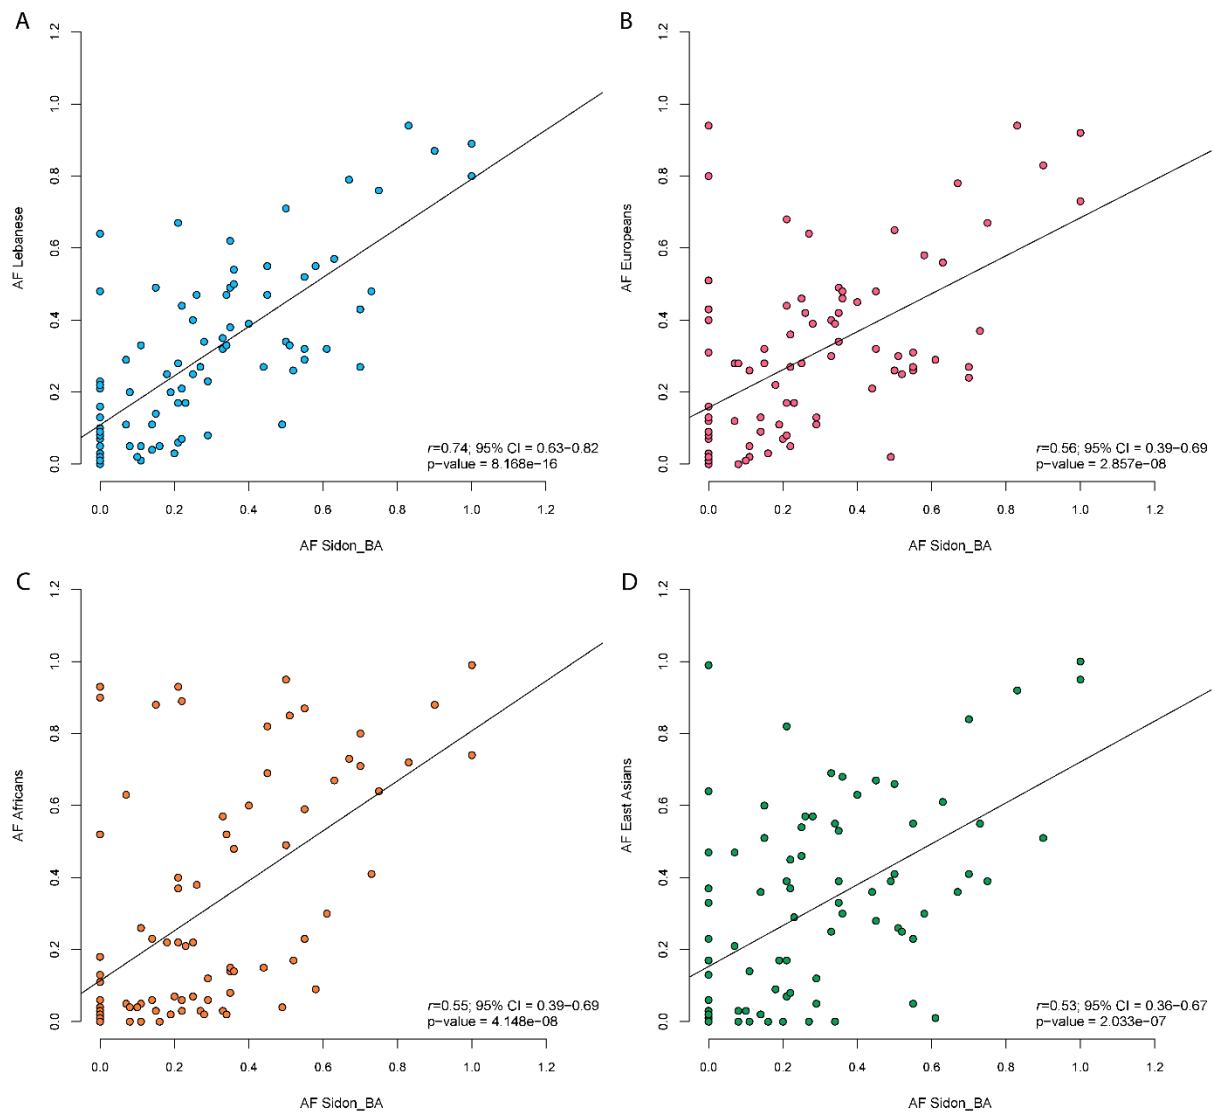

**Figure S9. Correlation between the frequencies of the putative functional variants in Sidon\_BA and present-day populations: (A) Lebanese (B) Europeans (C) Africans and (D) East Asians.**



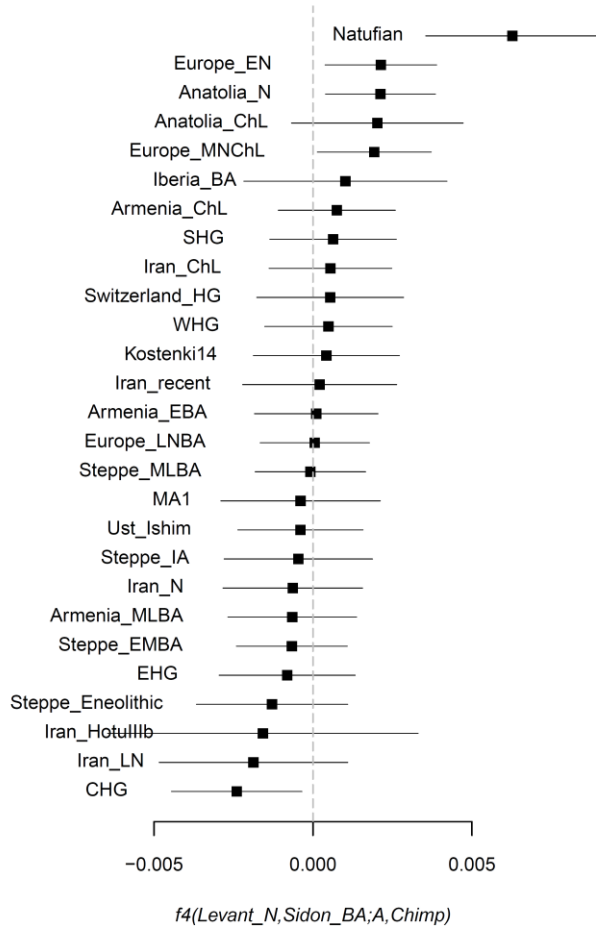

**Figure S10. Admixture in Bronze Age Levantine populations (transversions only).** We replicate the statistic  $f_4(\text{Levant}_N, \text{Sidon\_BA}; \text{Ancient Eurasian}, \text{Chimpanzee})$  using ~120,000 transversions and get results qualitatively similar to the results from using all variants.

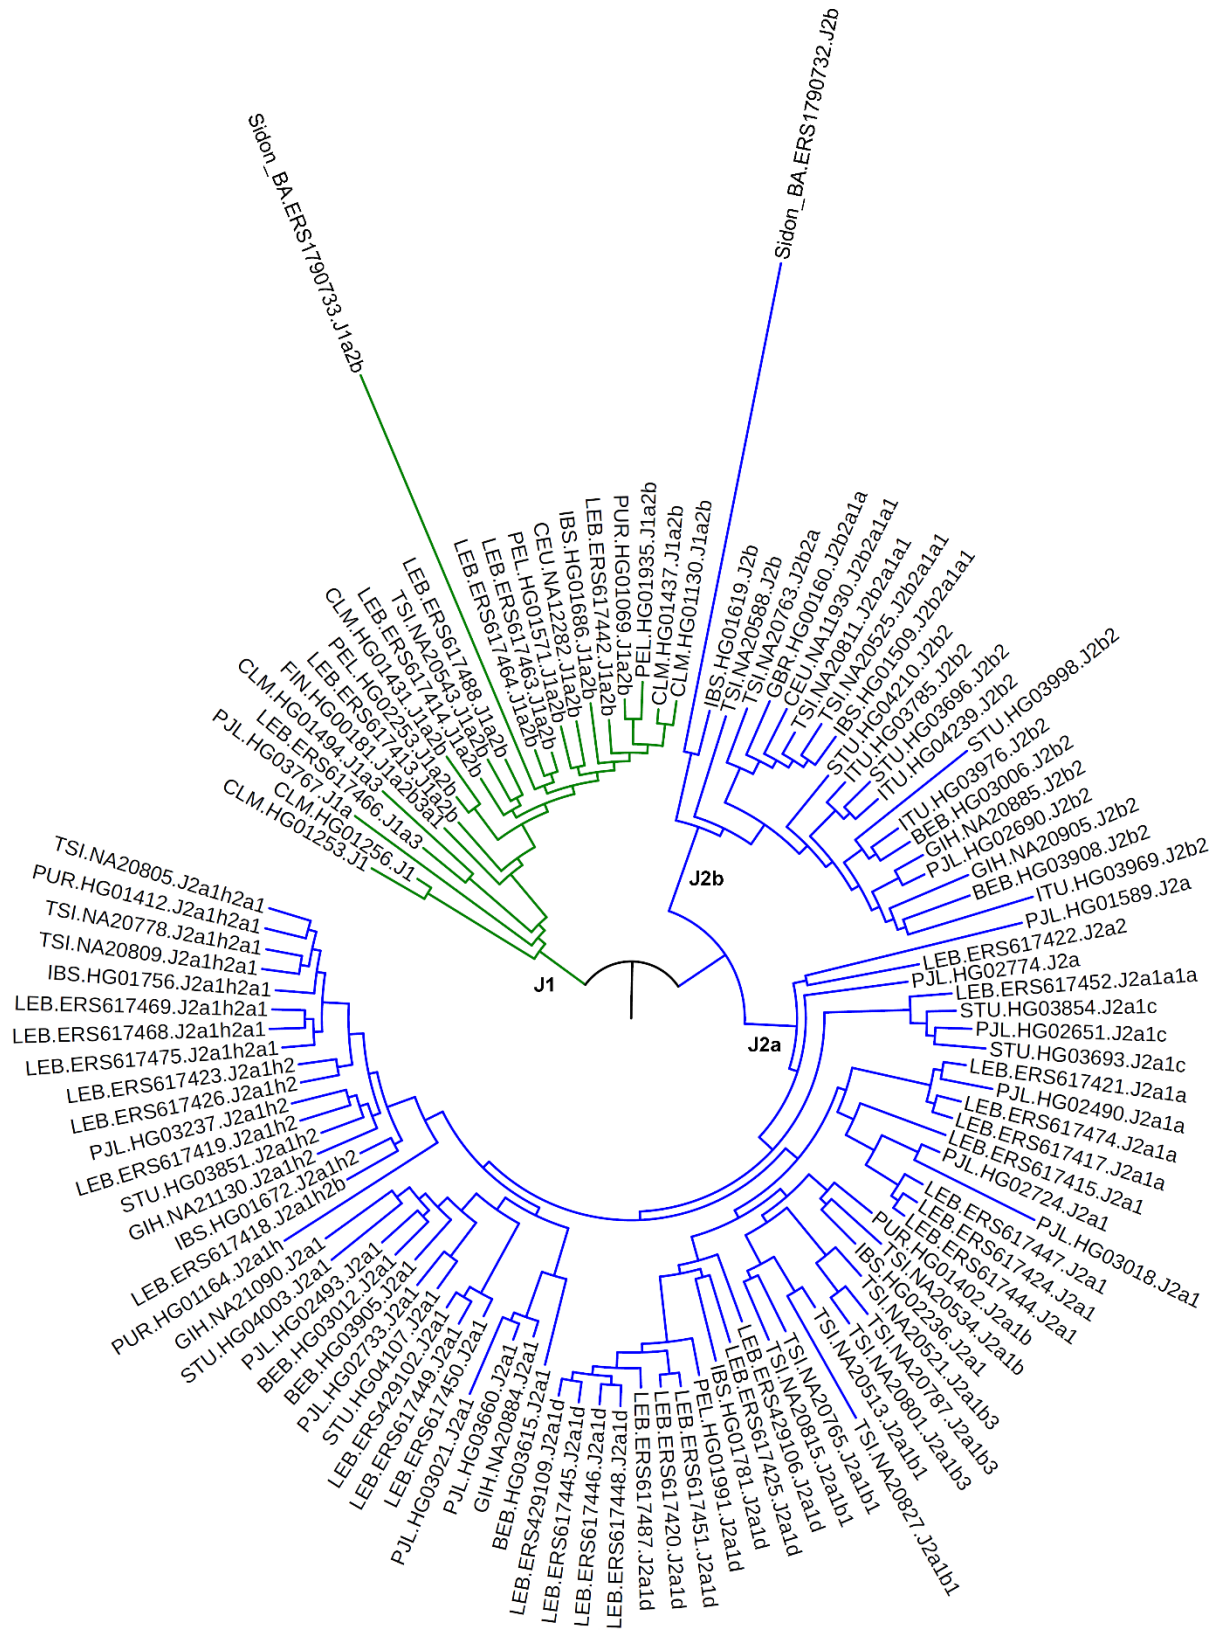

**Figure S11. Y-chromosome J lineage relationship tree.** A maximum likelihood phylogeny of Y chromosomes belonging to haplogroup J inferred using RAxML on males from the 1000 Genomes Project (76), present-day Lebanese (35), and Sidon\_BA (2). Tip labels show population and sample name as well as haplogroup identified by yHaplo using ISOGG 2016.01.04 annotations.

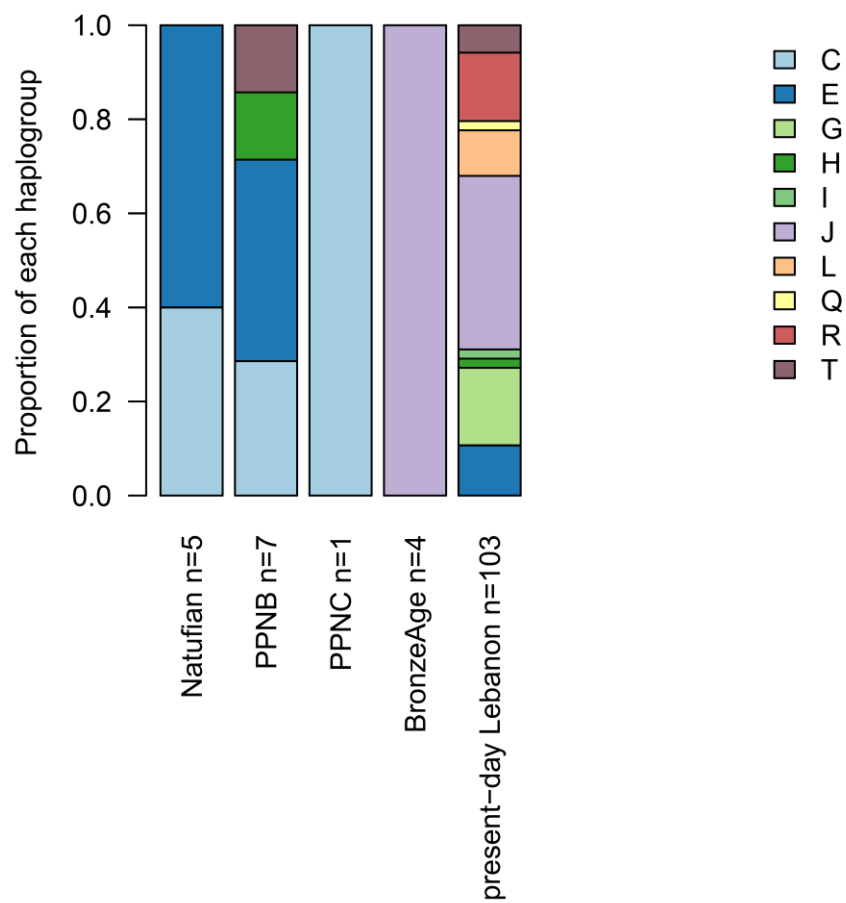

**Figure S12. Y-chromosome lineages frequencies in the Levant from Natufians to present-day populations.**

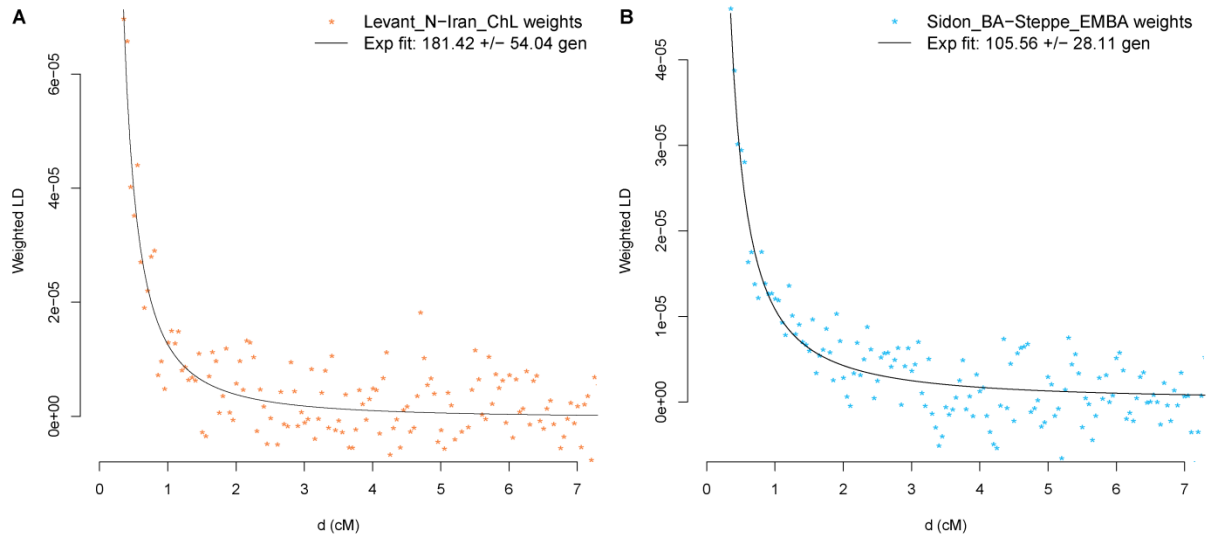

**Figure S13. Time of admixture in the Levant.** (A) and (B) Weighted LD decay curves for present-day Lebanese using ancient populations as references. (A) Using a generation time of 28 years; a mixture between populations related to Neolithic Levant and Chalcolithic Iran appears to have occurred 6,600-3,550 years ago and (B) mixture between populations related to Bronze Age Sidon and Bronze Age steppe occurred 3,750-2,170 years ago.



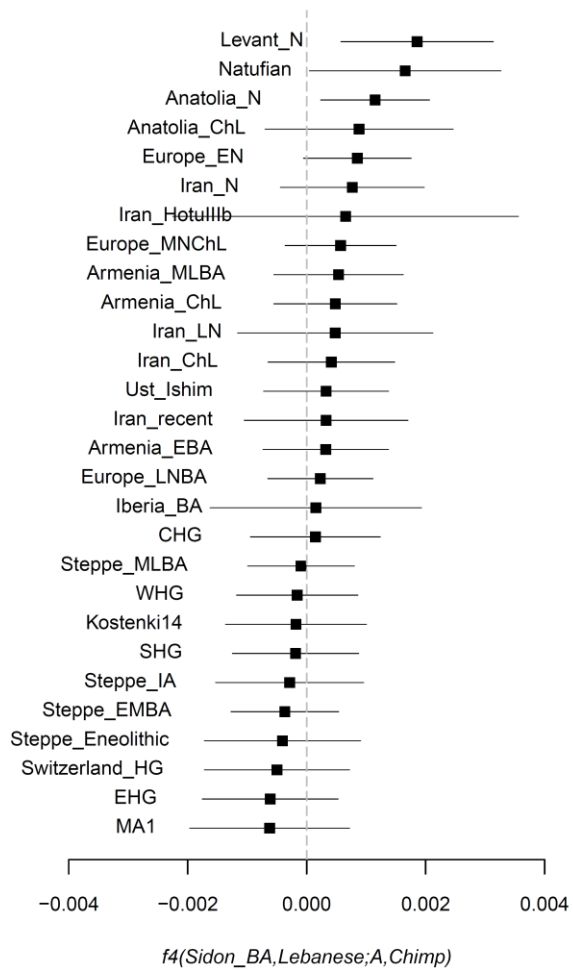

**Figure S14. Admixture in present-day Levantine populations (transversions only).** We replicate the statistic  $f_4(\text{Sidon\_BA, Lebanese; Ancient Eurasian, Chimpanzee})$  using only transversions and get results qualitatively similar to the results from using all variants.

**Table S1. Contamination estimates.**

| <b>Sample</b>        | <b>From mtDNA analysis (CI)<sup>a</sup></b> | <b>From male X chromosome analysis (SE)<sup>b</sup></b> |
|----------------------|---------------------------------------------|---------------------------------------------------------|
| <b>ERS1790732</b>    | 0.01 (0-0.02)                               |                                                         |
| Method1 <sup>†</sup> |                                             | 0.012 (0.002)                                           |
| Method2              |                                             | 0.014 (0.003)                                           |
| <b>ERS1790733</b>    | 0.01 (0-0.02)                               |                                                         |
| Method1              |                                             | 0.017 (0.005)                                           |
| Method2              |                                             | 0.019 (0.005)                                           |
| <b>ERS1790729</b>    | 0.01 (0-0.02)                               |                                                         |
| <b>ERS1790730</b>    | 0.01 (0-0.02)                               |                                                         |
| <b>ERS1790731</b>    | 0.01 (0-0.02)                               |                                                         |

<sup>†</sup>Using schmutzi<sup>3</sup>

<sup>b</sup>Two tests using ANGSD based on methods described in Rasmussen et al. 2011<sup>4</sup>

**Table S2. Phenotypic and disease traits in Sidon\_BA.** List of putatively functional variants previously identified in the Levant region and their allele frequencies in present-day populations as well as Bronze Age Sidon. We include the read counts as guidance to allele authenticity: for example little supported C>T and G>A variations should be taken with caution.

| Chr | Position  | rs ID       | Ref | Alt | Gene       | Phenotype                                                       | AF in present-day populations |        |        |        | AF in Bronze Age Sidon |         | Read counts in ancient samples |         |         | Sidon samples with coverage |  |
|-----|-----------|-------------|-----|-----|------------|-----------------------------------------------------------------|-------------------------------|--------|--------|--------|------------------------|---------|--------------------------------|---------|---------|-----------------------------|--|
|     |           |             |     |     |            |                                                                 | AF_Lebanese                   | AF_AFR | AF_ASN | AF_EUR | AF_Sidon               | total A | total C                        | total G | total T | n                           |  |
| 2   | 136608646 | rs4988235   | G   | A   | MCM6       | Lactose tolerance                                               | 0.02                          | 0.03   | 0      | 0.51   | 0.00                   | 0       | 0                              | 6       | 0       | 3                           |  |
| 5   | 33951693  | rs16891982  | C   | G   | SLC45A2    | Pigmentation                                                    | 0.64                          | 0.04   | 0.01   | 0.94   | 0.00                   | 0       | 9                              | 0       | 0       | 4                           |  |
| 5   | 33963870  | rs26722     | C   | T   | SLC45A2    | Pigmentation                                                    | 0.11                          | 0.04   | 0.39   | 0.02   | 0.49                   | 0       | 7                              | 0       | 5       | 4                           |  |
| 15  | 28365618  | rs12913832  | A   | G   | HERC2      | Pigmentation                                                    | 0.27                          | 0.03   | 0      | 0.64   | 0.27                   | 14      | 0                              | 3       | 0       | 4                           |  |
| 15  | 48426484  | rs1426654   | A   | G   | SLC24A5    | Pigmentation                                                    | 0.10                          | 0.93   | 0.99   | 0      | 0.00                   | 16      | 0                              | 0       | 0       | 4                           |  |
| 4   | 72618334  | rs7041      | A   | C   | GC         | Vitamin D levels                                                | 0.55                          | 0.09   | 0.3    | 0.58   | 0.58                   | 3       | 7                              | 0       | 0       | 5                           |  |
| 11  | 71152258  | rs736894    | C   | T   | DHCR7      | Vitamin D levels                                                | 0.34                          | 0.49   | 0.41   | 0.26   | 0.50                   | 0       | 6                              | 0       | 4       | 4                           |  |
| 7   | 141672604 | rs10246939  | T   | C   | TAS2R38    | Bitter taste perception                                         | 0.54                          | 0.48   | 0.68   | 0.46   | 0.36                   | 0       | 5                              | 0       | 10      | 5                           |  |
| 9   | 94118258  | rs10991898  | C   | T   | AUH        | 3-Methylglutonic aciduria type I                                | 0.20                          | 0.02   | 0.17   | 0.11   | 0.19                   | 0       | 5                              | 0       | 2       | 4                           |  |
| 4   | 100504566 | rs61733139  | G   | C   | MTPP       | Abetalipoproteinemia                                            | 0.01                          | 0.05   | 0      | 0.05   | 0.11                   | 1       | 0                              | 8       | 0       | 5                           |  |
| 4   | 100504664 | rs3816873   | T   | C   | MTPP       | Abetalipoproteinemia                                            | 0.33                          | 0.26   | 0.14   | 0.26   | 0.11                   | 0       | 1                              | 0       | 10      | 4                           |  |
| 4   | 100516022 | rs2306985   | C   | G   | MTPP       | Abetalipoproteinemia                                            | 0.47                          | 0.82   | 0.67   | 0.32   | 0.45                   | 0       | 3                              | 0       | 1       | 3                           |  |
| 4   | 1803704   | rs2234909   | T   | C   | FGFR3      | Achondroplasia                                                  | 0.17                          | 0.37   | 0.07   | 0.17   | 0.21                   | 0       | 1                              | 0       | 5       | 4                           |  |
| 11  | 5247141   | rs1609812   | G   | A   | HBB        | Beta thalassemia major                                          | 0.87                          | 0.88   | 0.51   | 0.83   | 0.90                   | 10      | 0                              | 2       | 0       | 5                           |  |
| 11  | 5248050   | rs35004220  | C   | T   | HBB        | Beta thalassemia major                                          | 0.05                          | 0      | 0      | 0      | 0.08                   | 0       | 10                             | 0       | 1       | 4                           |  |
| 15  | 91326099  | rs2227935   | C   | T   | BLM        | Bloom syndrome                                                  | 0.03                          | 0.07   | 0      | 0.07   | 0.20                   | 0       | 8                              | 0       | 2       | 5                           |  |
| 17  | 41244936  | rs799917    | G   | A   | BRCA1      | Breast-ovarian cancer                                           | 0.44                          | 0.89   | 0.37   | 0.36   | 0.22                   | 4       | 0                              | 11      | 0       | 5                           |  |
| 6   | 12903957  | rs9349379   | A   | G   | PHACTR1    | CAD                                                             | 0.35                          | 0.03   | 0.69   | 0.4    | 0.33                   | 3       | 0                              | 2       | 0       | 4                           |  |
| 9   | 22098574  | rs4977574   | A   | G   | CDKN2B-AS1 | CAD                                                             | 0.62                          | 0.14   | 0.53   | 0.49   | 0.35                   | 5       | 0                              | 3       | 0       | 4                           |  |
| 9   | 107620867 | rs2238066   | C   | T   | ABCA1      | CAD in familial hypercholesterolemia, protection against        | 0.43                          | 0.71   | 0.41   | 0.24   | 0.70                   | 0       | 5                              | 0       | 11      | 5                           |  |
| 1   | 53712727  | rs5174      | C   | T   | LRP8       | Myocardial infarction                                           | 0.21                          | 0.02   | 0.03   | 0.4    | 0.00                   | 0       | 6                              | 0       | 0       | 3                           |  |
| 6   | 31540313  | rs9092543   | A   | G   | LTA        | Myocardial infarction                                           | 0.23                          | 0.52   | 0.47   | 0.31   | 0.00                   | 11      | 0                              | 0       | 0       | 4                           |  |
| 12  | 10313448  | rs11053646  | C   | G   | OLR1       | Myocardial infarction                                           | 0.06                          | 0.22   | 0.17   | 0.08   | 0.21                   | 0       | 9                              | 2       | 1       | 5                           |  |
| 14  | 35761675  | rs1048990   | C   | G   | PSMA6      | Myocardial infarction                                           | 0.22                          | 0.03   | 0.37   | 0.16   | 0.00                   | 0       | 6                              | 0       | 0       | 3                           |  |
| 17  | 45368337  | rs15908     | A   | C   | ITGB3      | Myocardial infarction                                           | 0.48                          | 0.41   | 0.55   | 0.37   | 0.73                   | 3       | 8                              | 0       | 0       | 4                           |  |
| 13  | 113772707 | rs6041      | G   | A   | F7         | Myocardial infarction, decreased susceptibility to              | 0.23                          | 0.12   | 0.05   | 0.11   | 0.29                   | 2       | 0                              | 4       | 0       | 4                           |  |
| 6   | 6174866   | rs5982      | G   | A   | F13A1      | Myocardial infarction, protection against                       | 0.27                          | 0.15   | 0.36   | 0.21   | 0.44                   | 3       | 0                              | 4       | 0       | 3                           |  |
| 12  | 121416650 | rs1169288   | A   | C   | HNF1A      | Diabetes mellitus, noninsulin-dependent, 2                      | 0.49                          | 0.08   | 0.39   | 0.34   | 0.35                   | 3       | 2                              | 0       | 0       | 3                           |  |
| 12  | 121416864 | rs1800574   | C   | T   | HNF1A      | Diabetes mellitus, noninsulin-dependent, 2                      | 0.05                          | 0      | 0      | 0.03   | 0.16                   | 0       | 8                              | 0       | 1       | 5                           |  |
| 4   | 6302519   | rs1801212   | G   | A   | WFS1       | Diabetes mellitus, noninsulin-dependent, association with       | 0.80                          | 0.99   | 1      | 0.73   | 1.00                   | 14      | 0                              | 0       | 0       | 4                           |  |
| 4   | 6302889   | rs1801208   | G   | A   | WFS1       | Diabetes mellitus, noninsulin-dependent, association with       | 0.07                          | 0.03   | 0.08   | 0.05   | 0.22                   | 1       | 0                              | 5       | 0       | 4                           |  |
| 7   | 44189393  | rs144723656 | G   | A   | GCK        | Diabetes mellitus, noninsulin-dependent, late onset             | 0.00                          | 0      | 0      | 0.01   | 0.00                   | 0       | 0                              | 12      | 0       | 4                           |  |
| 8   | 118184783 | rs13266634  | C   | T   | SLC30A8    | Diabetes mellitus, noninsulin-dependent, susceptibility to      | 0.25                          | 0.07   | 0.46   | 0.28   | 0.25                   | 0       | 13                             | 0       | 3       | 4                           |  |
| 2   | 182542998 | rs8192556   | G   | T   | NEUROD1    | T2D                                                             | 0.05                          | 0      | 0      | 0.02   | 0.11                   | 1       | 0                              | 17      | 0       | 4                           |  |
| 2   | 227660544 | rs1801278   | C   | T   | IRS1       | T2D                                                             | 0.04                          | 0.06   | 0.02   | 0.09   | 0.14                   | 0       | 4                              | 0       | 1       | 3                           |  |
| 3   | 185511687 | rs4402960   | G   | T   | IGFBP2     | T2D                                                             | 0.32                          | 0.57   | 0.25   | 0.3    | 0.33                   | 1       | 0                              | 3       | 3       | 3                           |  |
| 3   | 185529080 | rs1470579   | A   | C   | IGFBP2     | T2D                                                             | 0.33                          | 0.85   | 0.26   | 0.3    | 0.51                   | 6       | 6                              | 0       | 0       | 5                           |  |
| 6   | 20679709  | rs7756992   | A   | G   | CDKAL1     | T2D                                                             | 0.29                          | 0.63   | 0.47   | 0.28   | 0.07                   | 13      | 0                              | 1       | 0       | 4                           |  |
| 7   | 127251188 | rs712701    | T   | G   | PAX4       | T2D                                                             | 0.79                          | 0.73   | 0.36   | 0.78   | 0.67                   | 1       | 0                              | 5       | 2       | 4                           |  |
| 10  | 114808902 | rs12255372  | G   | T   | TCF7L2     | T2D                                                             | 0.32                          | 0.3    | 0.01   | 0.29   | 0.61                   | 0       | 0                              | 6       | 9       | 4                           |  |
| 11  | 2857194   | rs2237895   | A   | C   | KCNQ1      | T2D                                                             | 0.38                          | 0.15   | 0.33   | 0.42   | 0.35                   | 3       | 2                              | 0       | 0       | 2                           |  |
| 11  | 17408630  | rs5215      | C   | T   | KCNJ11     | T2D                                                             | 0.71                          | 0.95   | 0.66   | 0.65   | 0.50                   | 0       | 3                              | 0       | 2       | 4                           |  |
| 11  | 17409069  | rs5218      | G   | A   | KCNJ11     | T2D                                                             | 0.14                          | 0.03   | 0.51   | 0.32   | 0.15                   | 2       | 0                              | 9       | 0       | 4                           |  |
| 11  | 44280090  | rs729287    | C   | T   | ALX4       | T2D                                                             | 0.21                          | 0.06   | 0.45   | 0.27   | 0.22                   | 0       | 10                             | 0       | 4       | 4                           |  |
| 17  | 36047417  | rs3110641   | G   | A   | HNF1B      | T2D                                                             | 0.32                          | 0.59   | 0.23   | 0.26   | 0.55                   | 3       | 0                              | 5       | 0       | 4                           |  |
| 17  | 36098040  | rs4430796   | A   | G   | HNF1B      | T2D                                                             | 0.55                          | 0.69   | 0.28   | 0.48   | 0.45                   | 9       | 0                              | 7       | 0       | 4                           |  |
| 20  | 43058267  | rs147638455 | A   | G   | HNF4A      | T2D                                                             | 0.01                          | 0      | 0      | 0      | 0.00                   | 7       | 0                              | 0       | 0       | 4                           |  |
| 3   | 10328453  | rs4684677   | T   | A   | GHRH       | Obesity                                                         | 0.03                          | 0.01   | 0.01   | 0.07   | 0.00                   | 0       | 0                              | 0       | 5       | 3                           |  |
| 5   | 148206440 | rs1042713   | G   | A   | ADRB2      | Obesity                                                         | 0.47                          | 0.52   | 0.55   | 0.39   | 0.34                   | 2       | 0                              | 5       | 0       | 4                           |  |
| 5   | 148206885 | rs1800888   | C   | T   | ADRB2      | Obesity                                                         | 0.02                          | 0      | 0      | 0.02   | 0.00                   | 0       | 7                              | 0       | 0       | 3                           |  |
| 5   | 149212243 | rs7732671   | G   | C   | PPARGC1B   | Obesity                                                         | 0.13                          | 0.18   | 0.06   | 0.08   | 0.00                   | 0       | 0                              | 5       | 0       | 3                           |  |
| 6   | 132212694 | rs7754561   | A   | G   | ENPP1      | Obesity                                                         | 0.52                          | 0.87   | 0.55   | 0.27   | 0.55                   | 2       | 0                              | 4       | 0       | 3                           |  |
| 8   | 37823798  | rs4994      | A   | G   | ADRB3      | Obesity                                                         | 0.07                          | 0.9    | 0.13   | 0.8    | 0.00                   | 12      | 0                              | 0       | 0       | 4                           |  |
| 16  | 53800954  | rs1421085   | T   | C   | FTO        | Obesity                                                         | 0.48                          | 0.06   | 0.17   | 0.43   | 0.00                   | 0       | 0                              | 0       | 4       | 3                           |  |
| 18  | 58039276  | rs2229616   | C   | T   | MC4R       | Obesity, autosomal dominant                                     | 0.00                          | 0.02   | 0.02   | 0.02   | 0.00                   | 0       | 7                              | 0       | 0       | 5                           |  |
| 16  | 67516945  | rs5030980   | C   | T   | AGRP       | Obesity, late-onset                                             | 0.08                          | 0.01   | 0      | 0.03   | 0.00                   | 0       | 10                             | 0       | 0       | 5                           |  |
| 3   | 12475557  | rs3856806   | C   | T   | PPARG      | Obesity, severe                                                 | 0.11                          | 0.05   | 0.21   | 0.12   | 0.07                   | 0       | 8                              | 0       | 0       | 5                           |  |
| 17  | 3397702   | rs12948217  | C   | T   | ASPA       | Canavan disease                                                 | 0.29                          | 0.23   | 0.05   | 0.31   | 0.55                   | 0       | 3                              | 0       | 2       | 4                           |  |
| 5   | 131676320 | rs1050152   | C   | T   | SLC22A4    | Celiac disease, Crohn's disease                                 | 0.33                          | 0.02   | 0      | 0.39   | 0.34                   | 0       | 5                              | 0       | 3       | 3                           |  |
| 14  | 81575005  | rs3783941   | C   | A   | TSHR       | Congenital Hypo Thyroidism                                      | 0.76                          | 0.64   | 0.39   | 0.67   | 0.75                   | 7       | 2                              | 0       | 0       | 4                           |  |
| 7   | 117199533 | rs213950    | G   | A   | CFTR       | Cystic fibrosis                                                 | 0.28                          | 0.93   | 0.39   | 0.44   | 0.21                   | 3       | 0                              | 6       | 0       | 3                           |  |
| 9   | 111651620 | rs3204145   | A   | T   | IKBKAP     | Dysautonomia, familial                                          | 0.17                          | 0.21   | 0.29   | 0.17   | 0.23                   | 4       | 0                              | 0       | 1       | 2                           |  |
| 1   | 169511755 | rs4524      | T   | C   | F5         | Factor V                                                        | 0.26                          | 0.17   | 0.25   | 0.25   | 0.52                   | 0       | 4                              | 0       | 4       | 4                           |  |
| 1   | 169519049 | rs6025      | T   | C   | F5         | Factor V                                                        | 0.08                          | 0      | 0      | 0.01   | 0.00                   | 0       | 5                              | 0       | 0       | 2                           |  |
| 16  | 3292874   | rs2741918   | C   | T   | MEFV       | Familial Mediterranean fever                                    | 0.57                          | 0.67   | 0.61   | 0.56   | 0.63                   | 0       | 3                              | 0       | 5       | 4                           |  |
| 16  | 3304463   | rs224222    | C   | T   | MEFV       | Familial Mediterranean fever                                    | 0.20                          | 0.04   | 0.03   | 0.28   | 0.08                   | 0       | 13                             | 0       | 2       | 4                           |  |
| 9   | 97873957  | rs4647534   | A   | G   | FANCC      | Fanconi anemia, complementation group C                         | 0.39                          | 0.6    | 0.63   | 0.45   | 0.40                   | 6       | 0                              | 2       | 0       | 4                           |  |
| 1   | 100316589 | rs2307130   | A   | G   | AGL        | Glycogen storage disease IIIb                                   | 0.40                          | 0.22   | 0.54   | 0.46   | 0.25                   | 8       | 0                              | 3       | 0       | 5                           |  |
| 8   | 19819724  | rs328       | C   | G   | LPL        | HDL cholesterol                                                 | 0.08                          | 0.06   | 0.12   | 0.13   | 0.29                   | 0       | 10                             | 6       | 0       | 5                           |  |
| 8   | 27373865  | rs751141    | G   | A   | EPHX2      | Hypercholesterolemia, familial, due to LDLR defect, modifier of | 0.05                          | 0.11   | 0.23   | 0.09   | 0.00                   | 0       | 0                              | 8       | 0       | 4                           |  |
| 5   | 42700044  | rs6179      | A   | G   | GHR        | Hypercholesterolemia, familial, modifier                        | 0.67                          | 0.4    | 0.82   | 0.68   | 0.21                   | 6       | 0                              | 1       | 0       | 4                           |  |
| 5   | 42719239  | rs6180      | A   | C   | GHR        | Hypercholesterolemia, familial, modifier                        | 0.47                          | 0.38   | 0.57   | 0.42   | 0.26                   | 2       | 1                              | 0       | 1       | 3                           |  |
| 11  | 17417496  | rs1800853   | G   | A   | ABCC8      | Hyperinsulinemic hypoglycemia, familial, 1                      | 0.02                          | 0.04   | 0.03   | 0.01   | 0.10                   | 1       | 0                              | 13      | 0       | 5                           |  |
| 7   | 113518434 | rs1799999   | C   | A   | PPP1R3A    | Insulin resistance, severe, digenic                             | 0.16                          | 0.18   | 0.64   | 0.12   | 0.00                   | 0       | 6                              | 0       | 0       | 5                           |  |
| 12  | 112939853 | rs3741983   | C   | T   | PTPN11     | Insulin resistance, susceptibility to                           | 0.27                          | 0.8    | 0.84   | 0.27   | 0.70                   | 0       | 5                              | 0       | 5       | 4                           |  |
| 19  | 11241915  | rs6413504   | A   | G   | LDLR       | LDL cholesterol                                                 | 0.50                          | 0.14   | 0.3    | 0.48   | 0.36                   | 10      | 0                              | 6       | 0       | 5                           |  |
| 4   | 38799710  | rs4833095   | T   | C   | TLR1       | Leprosy, immunity                                               | 0.49                          | 0.88   | 0.6    | 0.28   | 0.15                   | 0       | 1                              | 0       | 10      | 5                           |  |
| 1   | 100672060 | rs12021720  | T   | C   | DBT        | Maple syrup urine disease, type II                              | 0.89                          | 0.74   | 0.95   | 0.92   | 1.00                   | 0       | 10                             | 0       | 0       | 4                           |  |
| 15  | 72643444  | rs117160567 | A   | C   | HEXA       | Tay-Sachs disease                                               | 0.01                          | 0      | 0      | 0.02   | 0.00                   | 15      | 0                              | 0       | 0       | 4                           |  |
| 21  | 44480616  | rs1801181   | G   | A   | CBS        | Thrombosis, hyperhomocysteinemic                                | 0.34                          | 0.02   | 0.57   | 0.39   | 0.28                   | 3       | 0                              | 4       | 0       | 3                           |  |
| 10  | 56129066  | rs11594958  | A   | G   | PCDH15     | Usher syndrome, type 1F                                         | 0.25                          | 0.22   | 0.09   | 0.22   | 0.18                   | 6       | 0                              | 3       | 0       | 4                           |  |
| 1   | 68903942  | rs12145904  | C   | T   | RPE65      | Vitamin A metabolic defect                                      | 0.11                          | 0.23   | 0.36   | 0.13   | 0.14                   | 0       | 5                              | 0       | 1       | 2                           |  |
| 9   | 134385599 | rs2018621   | A   | G   | POMT1      | Walker-Warburg syndrome                                         | 0.94                          | 0.72   | 0.92   | 0.94   | 0.83                   | 1       | 0                              | 8       | 0       | 5                           |  |
| 14  | 77746310  | rs438931    | G   | A   | POMT2      | Walker-Warburg syndrome                                         | 0.09                          | 0.13   | 0.33   | 0.13   | 0.00                   | 0       | 0                              | 10      | 0       | 4                           |  |

**Table S3. Modeling Sidon\_BA as Levant\_N and an ancient population A.** Sidon\_BA can be modelled as a mix of Neolithic Levant  $0.484 \pm 0.042$  and Chalcolithic Iran  $0.516 \pm 0.042$  using a large number of outgroups: Ust\_Ishim, Kostenki14, MA1, Han, Papuan, Ami, Chukchi, Karitiana, Mbuti, Switzerland\_HG, EHG, WHG, and CHG.

| A                 | P-value for rank=1 | Mixture Proportions |        |            |
|-------------------|--------------------|---------------------|--------|------------|
|                   |                    | Levant_N            | A      | Std. Error |
| Iran_ChL          | 27.89E-02          | 0.484               | 0.516  | 0.042      |
| Iran_HotuIIIb     | 2.50E-02           | 0.593               | 0.407  | 0.048      |
| Iran_LN           | 2.45E-02           | 0.559               | 0.441  | 0.044      |
| Iran_recent       | 1.16E-02           | 0.309               | 0.691  | 0.089      |
| Natufian          | 0.94E-02           | 2.33                | -1.33  | 0.376      |
| Iran_N            | 0.45E-02           | 0.592               | 0.408  | 0.041      |
| Armenia_EBA       | 0.02E-02           | 0.528               | 0.472  | 0.046      |
| Anatolia_ChL      | 2.57E-07           | 0.324               | 0.676  | 0.123      |
| Armenia_MLBA      | 8.78E-11           | 0.653               | 0.347  | 0.052      |
| Europe_MNChL      | 6.11E-13           | 1.261               | -0.261 | 0.053      |
| Iberia_BA         | 3.82E-13           | 1.375               | -0.375 | 0.107      |
| Armenia_ChL       | 4.97E-14           | 0.692               | 0.308  | 0.063      |
| Europe_EN         | 5.73E-15           | 1.475               | -0.475 | 0.142      |
| SHG               | 3.50E-16           | 1.072               | -0.072 | 0.017      |
| Anatolia_N        | 6.71E-17           | 1.746               | -0.746 | 0.411      |
| Steppe_IA         | 4.02E-18           | 0.891               | 0.109  | 0.039      |
| Steppe_EMBA       | 7.68E-19           | 0.928               | 0.072  | 0.027      |
| Europe_LNBA       | 6.90E-20           | 1.053               | -0.053 | 0.04       |
| Steppe_Eneolithic | 5.79E-20           | 0.978               | 0.022  | 0.018      |
| Steppe_MLBA       | 2.71E-20           | 1.005               | -0.005 | 0.036      |

**Table S4. Counts of Y-chromosome ancestral and derived allele genotypes in the Sidon\_BA males**

| ERS1790733 observed genotypes |                             |                           | ERS1790732 observed genotypes |                             |                           |
|-------------------------------|-----------------------------|---------------------------|-------------------------------|-----------------------------|---------------------------|
| Haplogroup                    | Number of ancestral alleles | Number of derived alleles | Haplogroup                    | Number of ancestral alleles | Number of derived alleles |
| A00                           | 22                          | 0                         | A00                           | 26                          | 0                         |
| A0-T                          | 0                           | 7                         | A0-T                          | 0                           | 15                        |
| A0                            | 17                          | 0                         | A0                            | 12                          | 0                         |
| A1                            | 0                           | 4                         | A1                            | 0                           | 4                         |
| A1a                           | 8                           | 0                         | A1a                           | 7                           | 0                         |
| A1b                           | 1                           | 14                        | A1b                           | 1                           | 15                        |
| BT                            | 0                           | 121                       | BT                            | 0                           | 171                       |
| B                             | 1                           | 0                         | B                             | 1                           | 0                         |
| CT                            | 0                           | 73                        | CT                            | 1                           | 106                       |
| DE                            | 10                          | 0                         | DE                            | 13                          | 0                         |
| CF                            | 0                           | 2                         | CF                            | 0                           | 1                         |
| C                             | 2                           | 0                         | C                             | 5                           | 0                         |
| F                             | 0                           | 10                        | F                             | 0                           | 17                        |
| F1                            | 2                           | 0                         | F1                            | 2                           | 0                         |
| F3                            | 1                           | 0                         | F3                            | 1                           | 0                         |
| GHIJK                         | 0                           | 1                         | GHIJK                         | 0                           | 1                         |
| G                             | 70                          | 1                         | G                             | 81                          | 1                         |
| H                             | 8                           | 0                         | H                             | 10                          | 0                         |
| IJK                           | 0                           | 2                         | IJK                           | 0                           | 2                         |
| IJ                            | 0                           | 2                         | IJ                            | 0                           | 3                         |
| I                             | 51                          | 1                         | I                             | 63                          | 0                         |
| J                             | 0                           | 31                        | J                             | 0                           | 40                        |
| J1                            | 0                           | 1                         | J1                            | 1                           | 0                         |
| J2                            | 1                           | 0                         | J2                            | 0                           | 1                         |
| J1a                           | 0                           | 1                         | J1a                           | 1                           | 0                         |
| J2a                           | 2                           | 0                         | J2a                           | 3                           | 0                         |
| J2b                           | 2                           | 0                         | J2b                           | 0                           | 2                         |
| J1a3                          | 1                           | 0                         | J2b2a                         | 1                           | 0                         |
| J1a2a                         | 1                           | 0                         | J2b2a1                        | 1                           | 0                         |
| J1a2b                         | 0                           | 1                         | J2b2a1a                       | 1                           | 0                         |
| J1a2b3                        | 1                           | 0                         | J2b2a1a1                      | 1                           | 0                         |
| J1a2b3a                       | 1                           | 0                         |                               |                             |                           |





**Table S6: Modelling Lebanese as Sidon\_BA and an ancient population A.** Lebanese can be modelled as a mix of Bronze Age Sidon  $0.93 \pm 0.018$  and a steppe ancestry  $0.07 \pm 0.018$  using outgroups: Ust\_Ishim, Kostenki14, MA1, Han, Papuan, Ami, Chukchi, Karitiana, Mbuti, Switzerland\_HG, EHG, WHG, and CHG.

| A                 | P-value for rank=1 | Mixture Proportions |        |            |
|-------------------|--------------------|---------------------|--------|------------|
|                   |                    | Sidon_BA            | A      | Std. Error |
| Steppe_MLBA       | 9.49E-02           | 0.924               | 0.076  | 0.018      |
| Steppe_EMBA       | 9.48E-02           | 0.932               | 0.068  | 0.016      |
| Steppe_IA         | 9.28E-02           | 0.92                | 0.08   | 0.02       |
| Europe_LNBA       | 5.14E-02           | 0.927               | 0.073  | 0.019      |
| Steppe_Eneolithic | 5.14E-02           | 0.962               | 0.038  | 0.011      |
| Iran_LN           | 3.19E-02           | 1.16                | -0.16  | 0.063      |
| SHG               | 3.01E-02           | 0.972               | 0.028  | 0.008      |
| Iberia_BA         | 1.54E-02           | 0.934               | 0.066  | 0.022      |
| Iran_recent       | 1.24E-02           | 0.69                | 0.31   | 0.151      |
| Armenia_MLBA      | 1.04E-02           | 0.882               | 0.118  | 0.041      |
| Armenia_ChL       | 7.52E-03           | 0.887               | 0.113  | 0.042      |
| Iran_N            | 5.70E-03           | 1.104               | -0.104 | 0.055      |
| Natufian          | 3.93E-03           | 1.08                | -0.08  | 0.042      |
| Europe_MNChL      | 2.69E-03           | 0.962               | 0.038  | 0.019      |
| Anatolia_ChL      | 2.10E-03           | 0.881               | 0.119  | 0.087      |
| Mota              | 1.64E-03           | 1.007               | -0.007 | 0.004      |
| Europe_EN         | 1.51E-03           | 0.95                | 0.05   | 0.033      |
| Iran_ChL          | 1.15E-03           | 1.087               | -0.087 | 0.094      |
| Anatolia_N        | 7.98E-04           | 0.968               | 0.032  | 0.049      |
| Iran_Hotulllb     | 7.34E-04           | 1.023               | -0.023 | 0.068      |
| Armenia_EBA       | 6.77E-04           | 0.989               | 0.011  | 0.068      |

## Supplemental references

1. Lazaridis, I., Nadel, D., Rollefson, G., Merrett, D.C., Rohland, N., Mallick, S., Fernandes, D., Novak, M., Gamarra, B., Sirak, K., et al. (2016). Genomic insights into the origin of farming in the ancient Near East. *Nature* 536, 419-424.
2. Haber, M., Gauguier, D., Youhanna, S., Patterson, N., Moorjani, P., Botigue, L.R., Platt, D.E., Matisoo-Smith, E., Soria-Hernanz, D.F., Wells, R.S., et al. (2013). Genome-wide diversity in the levant reveals recent structuring by culture. *PLoS genetics* 9, e1003316.
3. Renaud, G., Slon, V., Duggan, A.T., and Kelso, J. (2015). Schmutzi: estimation of contamination and endogenous mitochondrial consensus calling for ancient DNA. *Genome biology* 16, 224.
4. Rasmussen, M., Guo, X., Wang, Y., Lohmueller, K.E., Rasmussen, S., Albrechtsen, A., Skotte, L., Lindgreen, S., Metspalu, M., Jombart, T., et al. (2011). An Aboriginal Australian genome reveals separate human dispersals into Asia. *Science* 334, 94-98.
